# Supplementary material for: Risk factors associated with air embolism following computed tomography-guided percutaneous lung biopsy: a retrospective case-control study
Source: PeerJ journal article supplement (doi:10.7717/peerj.18232), 2024-10-15
Supplement: Raw_data.xlsx [file Raw_data.xlsx]

## Sheet: Sheet1
Air Embolism(0-No,1-Yes)	Distance between lesion and pulmonary vein	Intraoperative hemoptysis(0-No,1-Yes)	Lesion cavity(0-No,1-Yes)	Lesion location(0-left up,1-left down,2-right up,3-right middle,4-right down)	Sampling numbers	Intraoperative cough(0-No,1-Yes)	Coagulation mechanism(0-No,1-Yes)	Puncture position(0-supine,1-prone,2-lateral recumbent )	Puncture needle to bleeding(0-No,1-Yes)	Procedure time	Sampling type(0-FNA,1-CNB)	Puncture angle	Pathological necrosis(0-No,1-Yes)	Distance between lesion and pleura	Lesion size(0-2.5-2.7cm,1-2.6-2.8cm)	Emphysema(0-No,1-Yes)	Pleural adhesion(0-No,1-Yes)	Postoperative pneumothorax(0-No,1-Yes)	Smoke(0-No,1-Yes)	Gender(0-Male,1-Female)	Age
0	2.3	0	0	0	1	0	0	0	0	10	1	10	0	4	0	0	0	0	1	1	55
0	3.7	0	0	0	5	0	1	0	0	11	1	50	0	5	0	1	0	0	0	0	54
0	10	0	0	0	3	0	1	1	0	10	1	47	0	6	0	0	0	0	1	1	56
0	6.5	0	0	0	2	0	0	0	0	9	1	0	0	5	0	0	0	1	1	1	58
0	5.6	0	0	0	1	0	0	0	0	13	1	38	0	4	0	0	1	0	0	0	59
0	5.1	0	0	0	4	1	1	1	1	10	1	13	0	4	0	1	0	0	0	0	53
0	8.1	0	0	0	2	0	0	0	0	8	1	22	0	3	0	0	0	0	0	0	23
0	7.3	0	0	0	2	0	0	2	0	9	1	43	0	3	0	0	0	0	0	0	41
0	6.4	0	0	0	3	1	1	0	0	7	1	0	0	3	1	1	0	0	0	0	44
0	5.6	0	0	0	4	0	0	1	0	10	1	52	0	3	0	0	0	1	1	1	47
0	9.1	0	0	1	3	0	0	0	0	10	0	87	0	2	0	0	1	0	0	0	46
0	10.2	0	0	1	1	1	1	0	0	10	0	90	0	6	0	0	0	0	0	0	48
0	2.1	0	0	1	6	0	0	2	0	9	0	65	0	5	1	1	0	0	1	1	49
0	6.4	0	0	1	2	0	0	0	0	8	0	0	0	4	0	0	0	1	0	0	52
0	9.8	0	0	1	5	1	1	0	0	10	0	80	0	10	0	0	0	0	1	1	78
0	9.7	0	0	1	5	0	0	1	0	8	0	81	1	9	0	1	0	0	0	0	76
0	9.6	0	0	1	4	0	0	2	0	7	0	70	0	9	0	0	1	1	0	0	77
0	9.5	0	0	1	4	1	0	0	0	5	0	70	0	8	1	0	0	0	1	1	90
0	9.4	0	0	1	4	0	1	0	0	11	1	80	0	8	0	0	0	0	0	0	84
0	9.3	0	0	1	1	0	0	0	0	10	1	88	1	8	0	1	0	0	0	0	83
0	8.4	0	0	2	1	1	0	1	0	9	1	88	0	7	0	0	0	1	1	1	87
0	10.2	0	0	2	1	0	0	2	0	8	1	85	0	6	0	0	0	0	0	0	72
0	6.6	0	0	2	7	0	1	0	0	8	1	89	1	6	0	0	1	0	1	1	71
0	5.7	0	0	2	5	1	0	0	0	7	1	79	0	7	1	0	0	1	0	0	65
0	7.3	0	0	2	7	0	0	1	0	6	1	50	0	6	0	0	0	0	1	0	63
0	2.1	0	0	2	3	0	0	0	0	11	1	40	0	6	0	1	0	0	0	0	68
0	2.2	0	0	2	2	1	1	2	1	12	1	45	1	6	0	0	0	0	0	0	64
0	2.3	0	0	2	4	0	0	0	0	13	1	48	0	5	0	0	1	1	1	1	58
0	2.5	0	0	2	1	0	0	0	0	15	0	49	0	6	0	0	0	0	1	1	52
0	2.6	0	0	2	2	1	0	1	0	10	0	48	1	6	0	0	0	0	1	1	57
0	2.8	0	0	3	3	0	1	2	0	8	0	52	0	6	0	1	0	0	1	1	54
0	2.9	0	0	3	2	0	0	0	0	9	0	59	0	6	1	0	0	1	1	1	52
0	3	0	0	3	2	1	0	0	1	8	0	58	0	5	0	0	0	0	1	1	51
0	3.5	0	0	3	2	0	0	1	0	8	0	56	1	5	0	0	0	0	1	1	53
0	3.6	0	0	3	1	0	1	0	0	7	0	57	0	5	0	1	0	0	1	1	52
0	3.8	0	0	3	1	1	0	2	0	9	0	51	0	5	1	0	0	0	1	1	59
0	3.7	0	0	3	2	0	0	0	0	7	0	52	0	9	0	0	0	1	1	1	46
0	4.1	0	0	3	3	0	0	1	0	9	0	80	0	10	0	0	0	0	1	1	43
0	4.3	0	0	3	5	1	1	2	1	5	1	84	0	10	0	0	0	0	1	1	48
0	4.6	0	0	3	4	0	0	0	0	6	1	80	1	9	1	1	1	0	1	1	49
0	4.7	0	0	4	3	0	0	0	0	7	1	89	0	9	0	0	0	0	1	1	47
0	5.1	0	0	4	3	1	0	1	0	8	1	85	0	8	0	0	0	1	1	1	41
0	5.9	0	0	4	2	0	1	2	0	9	1	87	0	8	0	0	0	0	0	0	42
0	5.8	0	0	4	2	0	0	0	0	10	1	86	0	8	0	0	0	0	0	0	46
0	5.7	0	0	4	1	1	0	0	0	11	1	70	1	4	0	1	0	0	1	1	45
0	5.4	0	0	4	1	0	0	1	1	12	1	74	0	5	0	0	0	0	1	1	48
0	6.7	0	0	4	5	0	1	0	0	13	1	79	0	5	1	0	1	0	1	1	47
0	6.8	0	0	4	1	1	0	2	0	10	1	11	0	5	0	0	0	0	1	1	49
0	6.9	0	0	4	2	0	0	0	0	8	0	0	1	5	0	0	0	0	1	1	32
0	7.2	0	0	4	3	0	0	0	0	11	0	0	0	5	0	0	0	1	1	1	36
0	7.3	0	0	0	3	1	0	0	1	9	0	10	0	5	1	0	0	0	0	0	39
0	7.5	0	0	0	1	0	1	0	0	9	0	16	0	6	0	0	1	0	1	1	35
0	7.4	0	0	0	1	0	0	1	0	10	0	15	0	7	0	1	0	0	1	1	34
0	2.1	0	0	0	2	1	0	2	0	9	0	17	1	4	0	0	0	1	1	1	36
0	2.5	0	0	0	2	0	0	1	0	10	0	18	0	3	0	0	0	0	1	1	38
0	2.6	0	0	0	4	0	0	2	0	8	0	19	0	3	1	0	0	0	0	0	37
0	2.4	0	0	0	4	1	1	0	0	7	0	20	0	4	0	0	0	0	0	0	35
0	2.8	0	0	0	4	0	0	0	0	8	0	24	0	4	0	1	1	0	0	0	25
0	2.7	0	0	0	4	0	0	0	1	15	0	25	1	4	0	0	0	0	0	0	27
0	3.1	0	0	0	4	1	0	0	0	10	1	26	0	4	0	0	0	1	1	1	29
0	3.5	0	0	1	3	0	0	1	0	9	1	28	0	4	0	0	0	0	0	0	25
0	3.3	0	0	1	3	0	0	1	0	8	1	27	0	3	0	1	0	0	0	0	26
0	3.6	0	0	1	3	1	1	2	0	7	1	26	0	3	1	0	0	0	1	1	18
0	4.5	0	0	1	3	0	0	0	0	6	1	21	0	3	0	0	0	0	0	0	13
0	4.6	0	0	1	3	0	0	0	0	6	1	25	0	3	0	0	0	1	0	0	82
0	4.3	0	0	1	3	1	0	1	0	7	1	24	0	2	0	0	0	0	0	0	87
0	5.4	0	0	1	3	0	0	2	0	8	1	23	1	3	0	0	1	0	1	0	86
0	5.6	0	0	1	3	1	1	2	0	9	0	20	0	3	1	0	0	0	0	0	85
0	5.5	0	0	1	5	0	0	0	1	10	0	25	0	3	0	0	0	0	0	0	84
0	6.1	0	0	1	5	0	0	0	0	11	0	26	0	2	0	1	0	0	0	0	71
0	6.3	0	0	2	5	1	0	1	0	10	0	28	0	2	0	0	0	0	1	1	73
0	6.5	0	0	2	5	0	0	0	0	9	0	25	1	2	0	0	0	0	1	1	76
0	6.7	0	0	2	5	0	0	1	1	9	0	11	0	2	0	0	0	1	1	1	79
0	7.4	0	0	2	5	1	1	0	0	9	0	15	0	2	0	0	0	0	1	1	77
0	7.5	0	0	2	5	0	0	2	0	9	1	10	0	2	1	1	0	0	0	0	75
0	7.6	0	0	2	5	1	0	0	1	9	1	19	1	9	0	0	0	0	0	0	74
0	7.6	0	0	2	4	0	0	0	0	9	1	51	0	1	0	0	0	0	0	0	72
0	7.9	0	0	2	3	0	0	1	0	9	1	59	0	1	0	0	0	0	1	1	59
0	8.2	0	0	2	3	1	0	2	1	13	1	58	0	2	0	1	0	0	0	0	58
0	8.3	0	0	2	3	0	1	0	0	10	1	54	0	0	0	0	1	0	0	0	55
0	8.4	0	0	3	3	0	0	0	0	10	1	56	0	1	1	0	0	1	0	0	59
0	8.6	0	0	3	3	1	0	0	0	12	1	52	0	1	0	0	0	0	1	1	54
0	8.9	0	0	3	2	0	0	1	1	13	1	53	0	0	0	0	0	0	1	1	57
0	9	0	0	3	2	0	1	2	0	10	1	11	1	1	0	0	0	0	1	1	56
0	9.7	0	0	3	2	1	1	2	0	10	0	8	0	0	0	0	1	0	1	1	52
0	9.5	0	0	3	2	0	0	0	0	10	0	5	0	1	0	1	0	1	0	0	54
0	9.4	0	0	3	2	0	0	0	0	9	0	4	0	2	1	0	0	0	0	0	62
0	1	0	0	3	1	1	0	1	0	8	0	6	0	2	0	0	0	0	1	1	64
0	1.5	0	0	3	1	0	0	1	1	10	0	1	1	2	0	0	0	0	0	0	69
0	1.6	0	0	3	1	0	1	0	0	8	0	2	0	2	0	0	0	0	0	0	68
0	1.2	0	0	4	1	1	0	2	0	7	0	5	0	3	0	1	0	0	0	0	67
0	1.3	0	0	4	1	0	0	2	1	5	0	5	0	3	1	0	1	1	0	0	62
0	1.5	0	0	4	6	0	0	0	0	11	1	44	1	2	0	0	0	0	1	1	65
0	1.4	0	0	4	5	1	1	1	0	10	1	16	0	1	0	0	0	0	1	1	63
0	1.6	0	0	4	2	1	0	0	1	9	1	18	0	2	1	0	0	0	1	1	64
0	1.8	0	0	4	1	1	1	2	0	8	1	12	0	2	0	0	1	1	1	1	68
0	1.9	0	0	4	4	1	0	0	0	8	1	90	0	1	0	0	0	0	1	1	69
0	1.7	0	0	4	3	1	1	0	1	7	1	90	0	2	0	0	0	0	0	0	62
0	1.5	0	0	4	2	0	0	0	0	6	1	1	0	2	0	0	0	0	1	1	64
0	1.6	0	0	4	3	0	1	0	0	11	1	2	1	1	0	1	0	0	1	1	66
0	1.2	0	0	0	2	0	1	1	0	12	1	5	0	2	1	0	0	1	1	1	62
0	1.3	0	0	0	2	0	0	0	0	13	1	9	0	0	0	0	1	0	1	1	65
0	1.4	0	0	0	2	0	0	0	0	15	0	8	0	0	0	0	0	0	1	1	68
0	1.8	0	0	0	2	1	1	1	1	8	0	7	0	0	0	0	0	0	1	1	52
0	1.6	0	0	0	1	0	0	0	0	8	0	6	1	0	1	0	0	1	0	0	51
0	1.8	0	0	0	1	0	0	2	0	10	0	5	0	1	0	0	0	0	0	0	58
0	2.4	0	0	0	1	1	1	0	0	8	0	8	0	1	0	1	1	0	0	0	57
0	2.6	0	0	0	1	0	0	1	0	9	0	7	0	1	0	0	0	0	0	0	54
0	2.7	0	0	0	1	0	0	0	0	9	0	4	0	1	0	0	0	1	1	1	52
0	2.8	0	0	0	1	1	1	0	0	11	0	6	0	1	0	0	0	0	1	1	53
0	2.4	0	0	1	6	0	0	2	0	10	0	1	0	0	1	0	0	0	1	1	51
0	2.8	0	0	1	7	0	0	0	0	9	0	11	0	1	0	1	1	0	1	1	59
0	3.4	0	0	1	2	1	1	0	0	5	1	15	0	1	0	0	0	0	1	1	54
0	3.3	0	0	1	1	0	0	1	0	6	1	19	1	1	0	1	0	0	0	0	58
0	3.1	0	0	1	5	0	0	2	0	7	1	14	0	4	0	0	0	0	1	1	52
0	3.2	0	0	1	3	1	0	0	0	8	1	18	0	2	0	0	0	1	1	1	54
0	3.5	0	0	1	2	0	1	0	0	9	1	16	0	0	0	0	1	0	0	0	55
0	3.4	0	0	1	1	0	0	0	0	10	1	17	0	1	0	1	0	0	0	0	48
0	3.8	0	0	1	4	1	0	1	0	11	1	12	0	1	0	0	0	0	0	0	49
0	3.4	0	0	1	2	0	0	2	0	12	1	42	1	5	0	0	0	0	0	0	47
0	2.5	0	0	2	2	0	1	0	0	13	1	48	0	9	1	1	0	0	0	0	46
0	2.6	0	0	2	3	1	0	0	0	15	1	46	0	8	0	0	0	1	1	1	41
0	2.7	0	0	2	4	0	0	1	0	8	0	48	0	7	0	0	1	0	0	0	42
0	2.8	0	0	2	3	0	0	0	0	11	0	47	1	4	0	0	0	0	0	0	43
0	2.9	0	0	2	1	1	1	2	1	12	0	49	0	6	1	1	0	0	1	1	48
0	3.4	0	0	2	6	0	0	0	0	8	0	42	0	2	0	0	0	1	0	0	45
0	3.5	0	0	2	2	0	0	0	0	12	0	41	1	3	0	0	0	0	1	1	46
0	3.6	0	0	2	5	1	0	1	0	9	0	34	0	3	0	1	0	0	0	0	47
0	3.7	0	0	2	5	0	1	2	0	15	0	32	0	15	0	0	1	1	0	0	49
0	4.9	0	0	2	4	0	0	0	0	8	0	35	0	14	1	0	0	0	1	1	45
0	4.5	0	0	3	4	1	0	0	1	9	0	39	1	13	0	0	0	0	0	0	51
0	4.8	0	0	3	4	0	0	1	0	9	0	32	0	14	0	1	0	0	0	0	58
0	4.7	0	0	3	1	0	1	0	0	10	0	36	0	11	0	0	0	1	1	1	59
0	4.6	0	0	3	1	1	0	2	0	10	1	38	1	12	0	0	0	0	0	0	59
0	4.5	0	0	3	1	0	0	0	0	9	1	3	0	2	0	0	1	0	1	1	54
0	5.1	0	0	3	7	0	0	1	0	8	1	2	0	0	1	0	0	1	0	0	52
0	5.2	0	0	3	5	1	1	2	1	7	1	8	0	2	0	0	0	0	1	0	50
0	5.3	0	0	3	7	0	0	0	0	6	1	7	1	8	0	1	0	0	0	0	56
0	5.4	0	0	3	3	0	0	0	0	6	1	9	0	9	0	0	0	0	0	0	58
0	5.5	0	0	3	2	1	0	1	0	7	1	27	0	7	0	0	1	1	1	1	52
0	5.9	0	0	4	4	0	1	2	0	8	1	26	0	1	0	0	0	0	1	1	53
0	5.7	0	0	4	1	0	0	0	0	9	0	24	0	5	0	0	0	0	1	1	51
0	5.8	0	0	4	2	1	0	0	0	10	0	28	0	5	0	1	0	0	1	1	58
0	2.3	0	0	4	3	0	0	1	1	11	0	24	1	4	1	0	0	1	1	1	59
0	3.7	0	0	4	2	0	1	0	0	10	0	25	0	4	0	0	0	0	1	1	62
0	10	0	0	4	2	1	0	2	0	9	0	26	0	6	0	0	0	0	1	1	68
0	6.5	0	0	4	2	0	0	0	0	8	0	23	0	6	0	1	0	0	1	1	67
0	5.6	0	1	4	1	0	0	0	0	7	0	34	0	3	1	0	0	0	1	1	64
0	5.1	0	1	4	1	1	0	0	1	10	1	38	1	3	0	0	0	1	1	1	62
0	8.1	0	1	4	2	0	1	0	0	9	1	39	0	5	0	0	0	0	1	1	61
0	7.3	0	1	0	3	0	0	1	0	8	1	35	0	2	0	0	0	0	1	1	69
0	6.4	0	1	0	5	1	0	2	0	9	1	34	0	5	1	1	1	0	1	1	68
0	5.6	0	0	0	4	0	0	1	0	13	1	33	1	7	0	0	0	0	1	1	72
0	9.1	0	0	0	3	0	0	2	0	10	1	33	0	3	0	0	0	1	1	1	71
0	10.2	0	0	0	3	1	1	0	0	8	1	32	0	2	0	0	0	0	0	0	71
0	2.1	0	0	0	2	0	0	0	0	12	1	35	0	2	0	0	0	0	0	0	36
0	6.4	0	0	0	2	0	0	0	1	10	1	3	0	2	0	1	0	0	1	1	35
0	9.8	0	0	0	1	1	0	0	0	9	1	69	1	3	0	0	0	0	1	1	39
0	9.7	0	0	0	1	0	0	1	0	9	0	68	0	3	1	0	1	0	1	1	34
0	9.6	0	0	0	5	0	0	1	0	9	0	67	0	3	0	0	0	0	1	1	48
0	9.5	0	0	1	1	1	1	2	0	9	0	64	0	3	0	0	0	0	1	1	49
0	9.4	0	0	1	2	0	0	0	0	8	0	61	0	3	0	0	0	1	1	1	47
0	9.3	0	0	1	3	0	0	0	0	10	0	60	1	1	1	0	0	0	0	0	45
0	8.4	0	0	1	3	1	0	1	0	8	0	68	0	1	0	0	1	0	1	1	41
0	10.2	0	0	1	1	0	0	2	0	7	0	65	0	5	0	1	0	0	1	1	42
0	6.6	0	0	1	1	1	1	2	0	5	0	62	0	6	0	0	0	1	1	1	43
0	5.7	0	0	1	2	0	0	0	1	11	1	69	0	4	0	0	0	0	1	1	48
0	7.3	0	0	1	2	0	0	0	0	10	1	67	0	4	1	0	0	0	0	0	55
0	2.1	0	0	1	4	1	0	1	0	9	1	62	0	5	0	0	0	0	0	0	54
0	2.2	0	0	1	4	0	0	0	0	8	1	70	0	6	0	1	1	0	0	0	56
0	2.3	0	0	2	4	0	0	1	1	8	1	71	1	5	0	0	0	0	0	0	58
0	2.5	0	0	2	4	1	1	0	0	7	1	72	0	4	0	0	0	1	1	1	59
0	2.6	0	0	2	4	0	0	2	0	6	1	79	0	4	0	0	0	0	0	0	53
0	2.8	0	0	2	3	1	0	0	1	11	1	78	0	3	0	1	0	0	0	0	23
0	2.9	0	0	2	3	0	0	0	0	12	1	74	0	3	1	0	0	0	1	1	41
0	3	0	0	2	3	0	0	1	0	13	1	75	1	3	0	0	0	0	0	0	44
0	3.5	0	0	2	3	1	0	2	1	15	0	71	0	3	0	0	0	1	0	0	47
0	3.6	0	0	2	3	0	1	0	0	9	0	78	0	2	0	0	0	0	0	0	46
0	3.8	0	0	2	3	0	0	0	0	8	0	72	0	6	0	0	1	0	1	0	48
0	3.7	0	0	2	3	1	0	0	0	9	0	78	1	5	1	0	0	0	0	0	49
0	4.1	0	0	3	3	0	0	1	1	12	0	80	0	4	0	0	0	0	0	0	52
0	4.3	0	0	3	5	0	1	2	0	10	0	84	0	10	0	1	0	0	0	0	78
0	4.6	0	0	3	5	1	1	2	0	9	0	86	0	9	0	0	0	0	1	1	53
0	4.7	0	0	3	5	0	0	0	0	9	0	87	0	9	0	0	0	0	1	1	77
0	5.1	0	0	3	5	0	0	0	0	9	0	85	0	8	0	0	0	1	1	1	90
0	5.9	0	0	3	5	1	0	1	0	9	0	80	0	8	0	0	0	0	1	1	84
0	5.8	0	0	3	5	0	0	1	1	5	1	89	0	8	1	1	0	0	0	0	83
0	5.7	0	0	3	5	0	1	0	0	6	1	90	1	7	0	0	0	0	0	0	87
0	5.4	0	0	3	5	1	0	2	0	7	1	25	0	6	0	0	0	0	0	0	72
0	6.7	0	0	3	4	0	0	2	1	8	1	78	0	6	0	0	0	0	1	1	71
0	6.8	0	0	4	3	0	0	0	0	9	1	90	0	7	0	1	0	0	0	0	65
0	6.9	0	0	4	3	1	1	1	0	10	1	0	0	6	0	0	1	0	0	0	63
0	7.2	0	0	4	3	1	0	0	1	11	1	80	1	6	1	0	0	1	0	0	68
0	7.3	0	0	4	3	1	1	2	0	12	1	55	0	6	0	0	0	0	1	1	64
0	7.5	0	0	4	3	1	0	0	0	13	1	35	0	5	0	0	0	0	1	1	58
0	7.4	0	0	4	2	1	1	0	1	15	1	25	0	6	0	0	0	0	1	1	52
0	2.1	0	0	4	2	0	0	0	0	8	0	70	1	6	0	0	1	0	1	1	57
0	2.5	0	0	4	2	0	1	0	0	11	0	0	0	6	0	1	0	1	0	0	54
0	2.6	0	0	4	2	0	1	1	0	12	0	90	0	6	1	0	0	0	0	0	52
0	2.4	0	0	4	2	0	0	0	0	9	0	45	0	5	0	0	0	0	1	1	51
0	2.8	0	0	0	1	0	0	0	0	10	0	64	0	5	0	0	0	0	0	0	53
0	2.7	1	0	0	1	1	1	1	1	11	0	0	0	5	0	0	0	0	0	0	52
0	3.1	1	0	0	1	0	0	0	0	10	0	80	0	5	0	1	0	0	0	0	59
0	3.5	1	0	0	1	0	0	2	0	8	0	81	1	9	1	0	1	1	0	0	46
0	3.3	1	0	0	1	1	1	0	0	9	0	70	0	10	0	0	0	0	1	1	43
0	3.6	1	0	0	6	0	0	1	0	9	0	70	0	10	0	0	0	0	1	1	48
0	4.5	1	0	0	5	0	0	0	0	9	0	80	0	9	1	0	0	0	1	1	49
0	4.6	1	0	0	2	1	1	0	0	10	1	88	0	9	0	0	1	1	1	1	47
0	4.3	0	0	0	1	0	0	2	0	9	1	88	1	8	0	0	0	0	1	1	41
0	5.4	0	0	0	4	0	0	0	0	8	1	85	0	8	0	0	0	0	0	0	42
0	5.6	0	0	1	3	1	1	0	0	7	1	89	0	8	0	0	0	0	1	1	46
0	5.5	0	0	1	2	0	0	1	0	6	1	79	0	4	0	1	0	0	1	1	45
0	6.1	0	0	1	3	0	0	2	0	6	1	50	0	5	1	0	0	1	1	1	48
0	6.3	0	0	1	2	1	0	0	0	7	1	40	0	5	0	0	1	0	1	1	47
0	6.5	0	0	1	2	0	1	0	0	8	1	45	0	5	0	0	0	0	1	1	49
0	6.7	1	1	1	2	0	0	0	0	9	0	48	0	5	0	0	0	0	1	1	32
0	7.4	1	1	1	2	1	0	1	0	10	0	49	0	5	1	0	0	1	0	0	36
0	7.5	1	1	1	1	0	0	2	0	11	0	48	1	5	0	0	0	0	0	0	39
0	7.6	1	1	1	1	0	1	0	0	8	0	52	0	6	0	1	1	0	0	0	35
0	7.6	0	0	1	1	1	0	0	0	9	0	59	0	5	0	0	0	0	0	0	34
0	7.9	0	0	2	1	0	0	1	0	9	0	58	0	4	0	0	0	1	1	1	36
0	8.2	0	0	2	1	0	0	0	0	10	0	56	0	3	0	0	0	0	1	1	38
0	8.3	1	0	2	1	1	1	2	1	10	1	57	0	3	1	0	0	0	1	1	37
0	8.4	1	0	2	6	0	0	0	0	9	1	51	1	4	0	1	1	0	1	1	35
0	8.6	1	0	2	7	0	0	0	0	10	1	52	0	4	0	0	0	0	1	1	25
0	8.9	1	0	2	2	1	0	1	0	9	1	80	0	4	0	1	0	0	0	0	27
0	9	1	0	2	1	0	1	2	0	13	1	84	0	4	0	0	0	0	1	1	29
0	9.7	0	0	2	5	0	0	0	0	10	1	80	1	4	0	0	0	1	1	1	25
0	9.5	0	0	2	3	1	0	0	1	10	1	89	0	3	0	0	1	0	0	0	26
0	9.4	0	0	2	2	0	0	1	0	12	1	85	0	3	0	1	0	0	0	0	18
0	1	0	0	3	1	0	1	0	0	10	1	87	1	3	0	0	0	0	0	0	13
0	1.5	0	0	3	4	1	0	2	0	9	1	86	0	3	0	0	0	0	0	0	82
0	1.6	0	0	3	2	0	0	0	0	9	0	70	0	2	1	1	0	0	0	0	87
0	1.2	0	0	3	2	0	0	1	0	9	0	74	0	3	0	0	0	1	1	1	86
0	1.3	0	0	3	3	1	1	2	1	9	0	79	1	3	0	0	1	0	0	0	85
0	1.5	0	0	3	4	0	0	0	0	9	0	11	0	3	0	0	0	0	0	0	84
0	1.4	0	0	3	3	0	0	0	0	10	0	90	0	2	1	1	0	0	1	1	71
0	1.6	0	0	3	1	1	0	1	0	8	0	90	1	2	0	0	0	1	0	0	73
0	1.8	0	0	3	6	0	1	2	0	7	0	10	0	2	0	0	0	0	1	1	76
0	1.9	0	0	3	2	0	0	0	0	5	0	16	0	2	0	1	0	0	0	0	79
0	1.7	0	0	4	5	1	0	0	0	11	1	15	0	2	0	0	1	1	0	0	77
0	1.5	0	0	4	5	0	0	1	1	10	1	17	1	2	1	0	0	0	1	1	75
0	1.6	0	0	4	4	0	1	0	0	9	1	18	0	6	0	0	0	0	0	0	74
0	1.2	0	0	4	4	1	0	2	0	8	1	19	0	1	0	1	0	0	0	0	72
0	1.3	0	0	4	4	0	0	0	0	8	1	20	0	1	0	0	0	1	1	1	59
0	1.4	0	0	4	1	0	0	0	0	7	1	24	0	2	0	0	0	0	0	0	58
0	1.8	1	0	4	1	1	0	0	1	6	1	25	0	0	0	0	1	0	1	1	55
0	1.6	0	0	4	1	0	1	0	0	11	1	26	1	1	1	0	0	1	0	0	59
0	1.8	1	0	4	7	0	0	1	0	12	1	28	0	1	0	0	0	0	1	0	54
0	2.4	0	0	4	5	1	0	2	0	13	1	27	0	0	0	1	0	0	0	0	57
0	2.6	1	0	0	7	0	0	1	0	15	0	26	0	1	0	0	0	0	0	0	56
0	2.7	0	0	0	3	0	0	2	0	10	0	21	0	0	0	0	1	1	1	1	52
0	2.8	1	0	0	2	1	1	0	0	10	0	25	1	1	0	0	0	0	1	1	54
0	2.4	0	0	0	4	0	0	0	0	9	0	24	0	2	0	0	0	0	1	1	62
0	2.8	1	0	0	1	0	0	0	1	12	0	23	0	2	0	1	0	0	1	1	64
0	3.4	0	0	0	2	1	0	0	0	13	0	20	0	2	1	0	0	1	1	1	69
0	3.3	1	0	0	3	0	0	1	0	10	0	25	1	2	0	0	0	0	1	1	68
0	3.1	0	0	0	2	0	0	1	0	11	0	26	0	3	0	0	0	0	1	1	67
0	3.2	0	0	0	2	1	1	2	0	9	0	28	0	3	0	1	0	0	1	1	62
0	3.5	0	0	0	2	0	0	0	0	9	0	25	0	2	1	0	0	0	1	1	65
0	3.4	0	0	1	1	0	0	0	0	5	1	11	0	1	0	0	0	1	1	1	63
0	3.8	0	0	1	1	1	0	1	0	6	1	15	1	2	0	0	0	0	1	1	64
0	3.4	0	0	1	2	0	0	2	0	7	1	10	0	2	0	0	0	0	1	1	68
0	2.5	0	0	1	3	1	1	2	0	8	1	19	0	1	1	1	1	0	1	1	69
0	2.6	0	0	1	5	0	0	0	1	9	1	51	0	2	0	0	0	0	1	1	62
0	2.7	0	0	1	4	0	0	0	0	10	1	59	0	2	0	0	0	1	1	1	64
0	2.8	0	0	1	3	1	0	1	0	11	1	58	1	1	0	0	0	0	0	0	66
0	2.9	0	0	1	3	0	0	0	0	10	1	54	0	2	0	0	0	0	0	0	62
0	3.4	0	0	1	2	0	0	1	1	13	1	56	0	0	0	1	0	0	1	1	65
0	3.5	0	0	1	2	1	1	0	0	15	1	52	0	0	0	0	0	0	1	1	68
0	3.6	0	0	2	1	0	0	2	0	8	0	53	0	0	1	0	1	0	1	1	52
0	3.7	0	0	2	1	1	0	0	1	11	0	11	0	0	0	0	0	0	1	1	51
0	4.9	0	0	2	5	0	0	0	0	12	0	8	0	1	0	0	0	0	1	1	58
0	4.5	0	0	2	1	0	0	1	0	10	0	5	0	1	0	0	0	1	1	1	57
0	4.8	0	0	2	2	1	0	2	1	9	0	4	1	1	1	0	0	0	0	0	54
0	4.7	0	0	2	3	0	1	0	0	9	0	6	0	1	0	0	1	0	1	1	52
0	4.6	0	0	2	3	0	0	0	0	15	0	1	0	1	0	1	0	0	1	1	53
0	4.5	0	0	2	1	1	0	0	0	9	0	2	0	0	0	0	0	1	1	1	51
0	5.1	0	0	2	1	0	0	1	1	8	0	5	0	1	0	0	0	0	1	1	59
0	5.2	0	0	2	2	0	1	2	0	8	0	5	1	1	1	0	0	0	0	0	54
0	5.3	0	0	3	2	1	1	2	0	15	0	44	0	1	0	0	0	0	0	0	58
0	5.4	0	0	3	4	0	0	0	0	10	1	16	0	4	0	1	1	0	0	0	52
0	5.5	0	0	3	4	0	0	0	0	9	1	18	0	2	0	0	0	0	0	0	54
0	5.9	0	0	3	4	1	0	1	0	8	1	12	1	0	0	0	0	1	1	1	55
0	5.7	0	0	3	4	0	0	1	1	7	1	90	0	1	0	0	0	0	0	0	48
0	5.8	0	0	3	4	0	1	0	0	6	1	90	0	1	0	1	0	0	0	0	49
0	2.3	0	0	3	3	1	0	2	0	6	1	1	0	5	1	0	0	0	1	1	47
0	3.7	0	0	3	3	0	0	2	1	7	1	2	0	9	0	0	0	0	0	0	46
0	10	0	0	3	3	0	0	0	0	8	1	5	0	8	0	0	0	1	0	0	41
0	6.5	0	0	3	3	1	1	1	0	9	0	9	0	7	0	0	0	0	0	0	42
0	5.6	0	0	4	3	1	0	0	1	10	0	8	0	4	0	0	1	0	1	0	43
0	5.1	0	0	4	3	1	1	2	0	11	0	7	1	6	1	0	0	0	0	0	48
0	8.1	0	0	4	3	1	0	0	0	12	0	6	0	2	0	0	0	0	0	0	45
0	7.3	0	0	4	3	1	1	0	1	13	0	5	0	3	0	1	0	0	0	0	46
0	6.4	0	0	4	5	0	0	0	0	14	0	8	0	3	0	0	0	0	1	1	47
0	5.6	0	0	4	5	0	1	0	0	15	0	7	0	15	0	0	0	0	1	1	49
0	9.1	0	0	4	5	0	1	1	0	15	1	4	1	14	0	0	0	1	1	1	45
0	10.2	0	0	4	5	0	0	0	0	15	1	6	0	13	0	0	0	0	1	1	51
0	2.1	0	0	4	5	0	0	0	0	10	1	1	0	14	1	1	0	0	0	0	58
0	6.4	0	0	4	5	1	1	1	1	9	1	11	0	11	0	0	0	0	0	0	59
0	9.8	0	0	0	5	0	0	0	0	13	1	15	1	12	0	0	0	0	0	0	59
0	9.7	0	0	0	5	0	0	2	0	10	1	19	0	2	0	0	0	0	1	1	54
0	9.6	0	0	0	4	1	1	0	0	9	1	14	0	0	0	1	0	0	0	0	52
0	9.5	0	0	0	3	0	0	1	0	12	1	18	0	2	0	0	1	0	0	0	50
0	9.4	0	0	0	3	0	0	0	0	13	1	16	0	8	1	0	0	1	0	0	56
0	9.3	0	1	0	3	1	1	0	0	14	1	17	0	9	0	0	0	0	1	1	58
0	8.4	0	1	0	3	0	0	2	0	15	0	12	0	7	0	0	0	0	1	1	52
0	10.2	0	1	0	3	0	0	0	0	9	0	42	1	1	0	0	0	0	1	1	53
0	6.6	0	1	0	2	1	1	0	0	9	0	48	0	5	0	0	1	0	1	1	51
0	5.7	0	1	0	2	0	0	1	0	9	0	46	0	5	0	1	0	1	0	0	58
0	7.3	0	1	1	2	0	0	2	0	10	0	48	0	4	1	0	0	0	0	0	59
0	2.1	0	1	1	2	1	0	0	0	8	0	47	0	4	0	0	0	0	1	1	62
0	2.2	0	0	1	2	0	1	0	0	7	0	49	1	6	0	0	0	0	0	0	68
0	2.3	0	1	1	1	0	0	0	0	5	0	42	0	6	0	0	0	0	0	0	67
0	2.5	0	0	1	1	1	0	1	0	11	1	41	0	3	0	1	0	0	0	0	64
0	2.6	0	0	1	1	0	0	2	0	10	1	34	0	3	1	0	1	1	0	0	62
0	2.8	0	0	1	1	0	1	0	0	9	1	32	0	5	0	0	0	0	1	1	61
0	2.9	0	0	1	1	1	0	0	0	8	1	35	0	2	0	0	0	0	1	1	69
0	3	1	0	1	6	0	0	1	0	8	1	39	0	5	1	0	0	0	1	1	68
0	3.5	1	0	1	5	0	0	0	0	7	1	32	0	7	0	0	1	1	1	1	72
0	3.6	0	0	2	2	1	1	2	1	6	1	36	0	3	0	0	0	0	1	1	71
0	3.8	1	1	2	1	0	0	0	0	11	1	38	1	2	0	0	0	0	0	0	71
0	3.7	1	1	2	4	0	0	0	0	12	1	3	0	2	0	0	0	0	1	1	36
0	4.1	1	1	2	3	1	0	1	0	13	1	2	0	2	0	1	0	0	1	1	35
0	4.3	1	1	2	2	0	1	2	0	15	0	8	0	3	1	0	0	1	1	1	39
0	4.6	0	0	2	3	0	0	0	0	10	0	7	0	3	0	0	1	0	1	1	34
0	4.7	0	0	2	2	1	0	0	1	9	0	9	0	3	0	0	0	0	1	1	48
0	5.1	0	0	2	2	0	0	1	0	9	0	27	1	3	0	0	0	0	1	1	49
0	5.9	0	0	2	2	0	1	0	0	12	0	26	0	3	1	0	0	1	0	0	47
0	5.8	0	0	2	2	1	0	2	0	13	0	24	0	1	0	0	0	0	0	0	45
0	5.7	0	0	3	1	0	0	0	0	15	0	28	0	1	0	1	1	0	0	0	41
0	5.4	0	0	3	1	0	0	1	0	11	0	24	1	5	0	0	0	0	0	0	42
0	6.7	0	0	3	1	1	1	2	1	9	0	25	0	6	0	0	0	1	1	1	43
0	6.8	0	0	3	1	0	0	0	0	9	0	26	0	4	0	0	0	0	1	1	48
0	6.9	0	0	3	1	0	0	0	0	5	1	23	1	4	1	0	0	0	1	1	55
0	7.2	0	0	3	1	1	0	1	0	6	1	34	0	5	0	1	1	0	1	1	54
0	7.3	0	0	3	6	0	1	2	0	7	1	38	0	6	0	0	0	0	1	1	56
0	7.5	0	0	3	7	0	0	0	0	8	1	39	0	5	0	1	0	0	0	0	58
0	7.4	0	0	3	2	1	0	0	0	9	1	35	1	4	0	0	0	0	1	1	59
0	2.1	0	0	3	1	0	0	1	1	10	1	34	0	4	0	0	0	1	1	1	53
0	2.5	0	0	4	5	0	1	0	0	11	1	33	0	3	0	0	1	0	0	0	23
0	2.6	0	0	4	3	1	0	2	0	12	1	33	1	3	0	1	0	0	0	0	41
0	2.4	0	0	4	2	0	0	0	0	13	1	32	0	3	0	0	0	0	0	0	44
0	2.8	0	0	4	1	0	0	0	0	9	1	35	0	3	0	0	0	0	0	0	47
0	2.7	0	0	4	4	1	0	0	1	8	0	3	0	2	1	1	0	0	0	0	46
0	3.1	0	0	4	2	0	1	0	0	11	0	69	1	6	0	0	0	1	1	1	48
0	3.5	0	0	4	2	0	0	1	0	12	0	68	0	5	0	0	1	0	0	0	49
0	3.3	0	0	4	3	1	0	2	0	10	0	67	0	4	0	0	0	0	0	0	52
0	3.6	0	0	4	4	0	0	1	0	9	0	64	0	10	1	1	0	0	1	1	78
0	4.5	0	0	4	3	0	0	2	0	12	0	61	0	9	0	0	0	1	0	0	44
0	4.6	0	0	0	1	1	1	0	0	9	0	60	0	9	0	0	0	0	1	1	77
0	4.3	0	0	0	6	0	0	0	0	8	0	68	1	8	0	1	0	0	0	0	90
0	5.4	0	0	0	2	0	0	0	1	8	0	65	0	8	0	0	1	1	0	0	84
0	5.6	0	0	0	5	1	0	0	0	9	0	62	0	8	1	0	0	0	1	1	83
0	5.5	0	0	0	5	0	0	1	0	9	0	69	0	7	0	0	0	0	0	0	87
0	6.1	0	0	0	4	0	0	1	0	10	1	67	0	6	0	1	0	0	0	0	72
0	6.3	0	0	0	4	1	1	2	0	9	1	62	1	6	0	0	0	1	1	1	71
0	6.5	0	0	0	4	0	0	0	0	8	1	70	0	7	0	0	0	0	0	0	65
0	6.7	0	0	0	1	0	0	0	0	7	1	71	0	6	0	0	1	0	1	1	63
0	7.4	0	0	0	1	1	0	1	0	6	1	72	0	6	1	0	0	1	0	0	68
0	7.5	0	0	1	1	0	0	2	0	6	1	79	1	6	0	0	0	0	1	0	64
0	7.6	0	0	1	7	1	1	2	0	7	1	78	0	5	0	1	0	0	0	0	58
0	7.6	0	0	1	5	0	0	0	1	8	1	74	0	6	0	0	0	0	0	0	52
0	7.9	0	0	1	7	0	0	0	0	9	0	75	0	6	0	0	1	1	1	1	57
0	8.2	0	0	1	3	1	0	1	0	10	0	71	0	6	0	0	0	0	1	1	54
0	8.3	0	0	1	2	0	0	0	0	11	0	78	1	6	0	0	0	0	1	1	52
0	8.4	0	0	1	4	0	0	1	1	12	0	72	0	5	0	1	0	0	1	1	51
0	8.6	0	0	1	1	1	1	0	0	13	0	78	0	5	1	0	0	1	1	1	53
0	8.9	0	0	1	2	0	0	2	0	14	0	80	0	5	0	0	0	0	1	1	52
0	9	0	0	1	3	1	0	0	1	15	0	84	0	5	0	0	0	0	1	1	59
0	9.7	1	0	2	2	0	0	0	0	15	1	86	1	9	0	1	0	0	1	1	46
0	9.5	1	1	2	2	0	0	1	0	15	1	87	0	10	1	0	0	0	1	1	43
0	9.4	1	1	2	2	1	0	2	1	10	1	85	0	10	0	0	0	1	1	1	48
0	1	1	1	2	1	0	1	0	0	9	1	80	0	9	0	0	0	0	1	1	49
0	1.5	1	0	2	1	0	0	0	0	13	1	89	0	9	0	0	0	0	1	1	47
0	1.6	1	0	2	2	1	0	0	0	10	1	90	0	8	1	1	1	0	1	1	41
0	1.2	1	0	2	3	0	0	1	1	23	1	55	0	8	0	0	0	0	1	1	42
0	1.3	1	0	2	5	0	1	2	0	12	1	0	0	8	0	0	0	1	1	1	46
0	1.5	1	1	2	4	1	1	2	0	13	1	35	1	4	0	0	0	0	0	0	45
0	1.4	1	0	2	3	0	0	0	0	14	1	28	0	5	0	0	0	0	0	0	48
0	1.6	1	1	3	3	0	0	0	0	15	0	0	0	5	0	1	0	0	1	1	47
0	1.8	1	1	3	2	1	0	1	0	10	0	68	0	5	0	0	0	0	1	1	49
0	1.9	1	1	3	2	0	0	1	1	9	0	81	0	5	1	0	1	0	1	1	32
0	1.7	0	1	3	1	0	1	0	0	9	0	0	1	5	0	0	0	0	1	1	36
0	1.5	1	0	3	1	1	0	2	0	10	0	90	0	5	0	0	0	0	1	1	39
0	1.6	1	0	3	5	0	0	2	1	8	0	0	0	6	0	0	0	1	1	1	35
0	1.2	1	1	3	1	0	0	0	0	7	0	26	0	5	1	0	0	0	0	0	34
0	1.3	1	0	3	2	1	1	1	0	5	0	38	1	4	0	0	1	0	1	1	36
0	1.4	1	1	3	3	1	0	0	1	11	1	0	0	3	0	1	0	0	1	1	38
0	1.8	1	1	3	3	1	1	2	0	10	1	50	0	3	0	0	0	1	1	1	37
0	1.6	1	0	4	1	1	0	0	0	9	1	80	0	4	0	0	0	0	1	1	35
0	1.8	1	0	4	1	1	1	0	1	8	1	81	0	4	1	0	0	0	0	0	25
0	2.4	1	0	4	2	0	0	0	0	8	1	70	0	4	0	0	0	0	0	0	27
0	2.6	0	1	4	2	0	1	0	0	7	1	70	0	4	0	1	1	0	0	0	29
0	2.7	1	0	4	4	0	1	1	0	6	1	80	0	4	0	0	0	0	0	0	25
0	2.8	0	0	4	4	0	0	0	0	11	1	88	1	3	0	0	0	1	1	1	26
0	2.4	1	0	4	4	0	0	0	0	12	1	88	0	3	0	0	0	0	0	0	18
0	2.8	1	0	4	4	1	1	1	1	13	1	85	0	3	0	1	0	0	0	0	13
0	3.4	1	1	4	4	0	0	0	0	15	0	89	0	3	1	0	0	0	1	1	82
0	3.3	1	1	4	3	0	0	2	0	10	0	79	0	2	0	0	0	0	0	0	87
0	3.1	1	1	0	3	1	1	0	0	9	0	50	1	3	0	0	0	1	0	0	86
0	3.2	1	1	0	3	0	0	1	0	9	0	40	0	3	0	0	0	0	0	0	85
0	3.5	0	0	0	3	0	0	0	0	9	0	45	0	3	0	0	1	0	1	0	84
0	3.4	0	0	0	3	1	1	0	0	13	0	48	0	2	1	0	0	0	0	0	71
0	3.8	0	0	0	3	0	0	2	0	15	0	49	1	2	0	0	0	0	0	0	73
0	3.4	0	0	0	3	0	0	0	0	11	0	48	0	2	0	1	0	0	0	0	76
0	2.5	0	0	0	3	1	1	0	0	17	0	52	0	2	0	0	0	0	1	1	79
0	2.6	0	0	0	5	0	0	1	0	9	0	59	0	2	0	0	0	0	1	1	77
0	2.7	0	0	0	5	0	0	2	0	5	1	58	0	2	0	0	0	1	1	1	75
0	2.8	0	0	0	5	1	0	0	0	6	1	56	0	2	0	0	0	0	1	1	74
0	2.9	1	0	1	5	0	1	0	0	7	1	57	0	1	1	1	0	0	0	0	72
0	3.4	1	1	1	5	0	0	0	0	8	1	51	1	1	0	0	0	0	0	0	59
0	3.5	1	0	1	5	1	0	1	0	9	1	52	0	2	0	0	0	0	0	0	58
0	3.6	1	0	1	5	0	0	2	0	10	1	80	0	0	0	0	0	0	1	1	55
0	3.7	1	0	1	5	0	1	0	0	11	1	84	0	1	0	1	0	0	0	0	59
0	4.9	1	0	1	4	1	0	0	0	12	1	80	0	1	0	0	1	0	0	0	54
0	4.5	1	1	1	3	0	0	1	0	13	1	89	1	0	1	0	0	1	0	0	57
0	4.8	1	1	1	3	0	0	0	0	15	1	85	0	1	0	0	0	0	1	1	56
0	4.7	1	0	1	3	1	1	2	1	8	0	87	0	0	0	0	0	0	1	1	52
0	4.6	1	0	1	3	0	0	0	0	11	0	86	0	1	0	0	0	0	1	1	54
0	4.5	0	0	2	3	0	0	0	0	12	0	70	0	2	0	0	1	0	1	1	62
0	5.1	0	0	2	2	1	0	1	0	9	0	74	0	2	0	1	0	1	0	0	64
0	5.2	0	0	2	2	0	1	2	0	10	0	79	0	2	1	0	0	0	0	0	69
0	5.3	0	0	2	2	0	0	0	0	8	0	11	0	2	0	0	0	0	1	1	68
0	5.4	0	0	2	2	1	0	0	1	15	0	90	0	3	0	0	0	0	0	0	67
0	5.5	0	0	2	2	0	0	1	0	10	0	90	1	3	0	0	0	0	0	0	62
0	5.9	0	0	2	1	0	1	0	0	8	0	10	0	2	0	1	0	0	0	0	65
0	5.7	0	0	2	1	1	0	2	0	8	0	16	0	1	1	0	1	1	0	0	63
0	5.8	0	0	2	1	0	0	0	0	15	0	15	0	2	0	0	0	0	1	1	64
0	2.3	0	0	2	1	0	0	1	0	10	1	17	0	2	0	0	0	0	1	1	68
0	3.7	0	0	3	1	1	1	2	1	9	1	18	0	1	1	0	0	0	1	1	69
0	10	0	0	3	6	0	0	0	0	8	1	19	1	2	0	0	1	1	1	1	62
0	6.5	0	0	3	5	0	0	0	0	7	1	20	0	2	0	0	0	0	1	1	64
0	5.6	0	0	3	2	1	0	1	0	6	1	24	0	1	0	0	0	0	0	0	66
0	5.1	0	0	3	1	0	1	2	0	6	1	25	0	2	0	0	0	0	1	1	62
0	8.1	0	0	3	4	0	0	0	0	7	1	26	1	0	0	1	0	0	1	1	65
0	7.3	0	0	3	3	1	0	0	0	8	1	28	0	0	1	0	0	1	1	1	68
0	6.4	0	0	3	2	0	0	1	1	9	0	27	0	0	0	0	1	0	1	1	52
0	5.6	0	0	3	3	0	1	0	0	10	0	26	1	0	0	0	0	0	1	1	51
0	9.1	0	0	3	2	1	0	2	0	11	0	21	0	1	0	0	0	0	1	1	58
0	10.2	0	0	4	2	0	0	0	0	12	0	25	0	1	1	0	0	1	0	0	57
0	2.1	0	0	4	2	0	0	0	0	13	0	24	0	1	0	0	0	0	0	0	54
0	6.4	0	0	4	2	1	0	0	1	14	0	23	1	1	0	1	1	0	0	0	52
0	9.8	0	0	4	1	0	1	0	0	15	0	20	0	1	0	0	0	0	0	0	53
0	9.7	0	0	4	1	0	0	1	0	15	1	25	0	0	0	0	0	1	1	1	51
0	9.6	0	0	4	1	1	0	2	0	15	1	26	1	1	0	0	0	0	1	1	59
0	9.5	0	0	4	1	0	0	1	0	10	1	28	0	1	1	0	0	0	1	1	54
0	9.4	0	0	4	1	0	0	2	0	9	1	25	0	1	0	1	1	0	1	1	58
0	9.3	0	0	4	1	1	1	0	0	13	1	11	0	4	0	0	0	0	1	1	52
0	8.4	0	0	4	6	0	0	0	0	10	1	15	1	2	0	1	0	0	0	0	54
0	10.2	0	0	0	7	0	0	0	1	10	1	10	0	0	0	0	0	0	1	1	55
0	6.6	0	0	0	2	1	0	0	0	12	1	19	0	1	0	0	0	1	1	1	48
0	5.7	0	0	0	1	0	0	1	0	13	1	51	0	1	0	0	1	0	0	0	49
0	7.3	0	0	0	5	0	0	1	0	14	1	59	0	5	0	1	0	0	0	0	47
0	2.1	0	0	0	3	1	1	2	0	15	0	58	0	9	0	0	0	0	0	0	46
0	2.2	0	0	0	2	0	0	0	0	9	0	54	1	8	0	0	0	0	0	0	41
0	2.3	0	0	0	1	0	0	0	0	9	0	56	0	7	1	1	0	0	0	0	42
0	2.5	0	0	0	4	1	0	1	0	9	0	52	0	4	0	0	0	1	1	1	43
0	2.6	0	0	0	2	0	0	2	0	10	0	53	0	6	0	0	1	0	0	0	48
0	2.8	0	0	0	2	1	1	2	0	8	0	11	0	2	0	0	0	0	0	0	45
0	2.9	1	0	1	3	0	0	0	1	7	0	8	1	3	1	1	0	0	1	1	46
0	3	1	1	1	4	0	0	0	0	5	0	5	0	3	0	0	0	1	0	0	47
0	3.5	1	1	1	3	1	0	1	0	11	1	4	0	15	0	0	0	0	1	1	49
0	3.6	1	1	1	1	0	0	0	0	10	1	6	0	14	0	1	0	0	0	0	45
0	3.8	1	0	1	6	0	0	1	1	9	1	1	1	13	0	0	1	1	0	0	51
0	3.7	1	0	1	2	1	1	0	0	8	1	2	0	14	1	0	0	0	1	1	58
0	4.1	1	0	1	5	0	0	2	0	8	1	5	0	11	0	0	0	0	0	0	59
0	4.3	1	0	1	5	1	0	0	1	7	1	5	0	12	0	1	0	0	0	0	59
0	4.6	1	1	1	4	0	0	0	0	6	1	44	0	2	0	0	0	1	1	1	54
0	4.7	1	0	1	4	0	0	1	0	11	1	16	1	0	0	0	0	0	0	0	52
0	5.1	1	1	2	4	1	0	2	1	12	1	18	0	2	0	0	1	0	1	1	50
0	5.9	1	1	2	1	0	1	0	0	13	1	12	0	8	1	0	0	1	0	0	56
0	5.8	1	1	2	1	0	0	0	0	15	0	90	0	9	0	0	0	0	1	0	58
0	5.7	0	1	2	1	1	0	0	0	10	0	90	0	7	0	1	0	0	0	0	52
0	5.4	1	0	2	7	0	0	1	1	18	0	1	1	1	0	0	0	0	0	0	53
0	6.7	1	0	2	5	0	1	2	0	16	0	2	0	5	0	0	1	1	1	1	51
0	6.8	1	1	2	7	1	1	2	0	12	0	5	0	5	0	0	0	0	1	1	58
0	6.9	1	0	2	3	0	0	0	0	13	0	9	0	4	0	0	0	0	1	1	59
0	7.2	1	1	2	2	0	0	0	0	15	0	8	0	4	0	1	0	0	1	1	62
0	7.3	1	1	2	4	1	0	1	0	11	0	7	0	6	1	0	0	1	1	1	68
0	7.5	1	0	3	1	0	0	1	1	17	0	6	0	6	0	0	0	0	1	1	67
0	7.4	1	0	3	2	0	1	0	0	9	0	5	0	3	0	0	0	0	1	1	64
0	2.1	1	0	3	3	1	0	2	0	5	1	8	1	3	0	1	0	0	1	1	62
0	2.5	0	1	3	2	0	0	2	1	6	1	7	0	5	1	0	0	0	1	1	61
0	2.6	1	0	3	2	0	0	0	0	7	1	4	0	2	0	0	0	1	1	1	69
0	2.4	0	0	3	2	1	1	1	0	8	1	6	0	5	0	0	0	0	1	1	68
0	2.8	1	0	3	1	1	0	0	1	9	1	1	0	7	0	0	0	0	1	1	72
0	2.7	1	0	3	1	1	1	2	0	10	1	11	1	3	1	1	1	0	1	1	71
0	3.1	1	1	3	2	1	0	0	0	11	1	15	0	2	0	0	0	0	1	1	71
0	3.5	1	1	3	3	1	1	0	1	12	1	19	0	2	0	0	0	1	1	1	36
0	3.3	1	1	4	5	0	0	0	0	13	1	14	0	2	0	0	0	0	0	0	35
0	3.6	1	1	4	4	0	0	0	0	15	1	18	1	3	0	0	0	0	0	0	39
0	4.5	0	0	4	3	0	1	1	0	8	0	16	0	3	0	1	0	0	1	1	34
0	4.6	0	0	4	3	0	1	0	0	11	0	17	0	3	0	0	0	0	1	1	48
0	4.3	0	0	4	2	0	0	0	0	12	0	12	0	3	1	0	1	0	1	1	49
0	5.4	0	0	4	2	0	0	1	1	10	0	42	0	3	0	0	0	0	1	1	47
0	5.6	0	0	4	1	1	1	0	0	13	0	48	0	1	0	0	0	0	1	1	45
0	5.5	0	0	4	1	0	0	2	0	11	0	46	0	1	0	0	0	1	1	1	41
0	6.1	0	0	4	5	0	0	0	0	15	0	48	0	5	1	0	0	0	0	0	42
0	6.3	0	0	4	1	1	1	1	0	9	0	47	1	6	0	0	1	0	1	1	43
0	6.5	1	0	0	2	0	0	0	0	9	0	49	0	4	0	1	0	0	1	1	48
0	6.7	1	1	0	3	0	0	0	0	9	0	42	0	4	0	0	0	1	1	1	55
0	7.4	1	0	0	3	1	1	2	0	15	0	41	0	5	0	0	0	0	1	1	54
0	7.5	1	0	0	1	0	0	0	0	10	1	34	0	6	1	0	0	0	0	0	56
0	7.6	1	0	0	1	0	0	0	0	9	1	32	1	5	0	0	0	0	0	0	58
0	7.6	1	0	0	2	1	1	1	0	8	1	35	0	4	0	1	1	0	0	0	59
0	7.9	1	1	0	2	0	0	2	0	7	1	39	0	4	0	0	0	0	0	0	53
0	8.2	1	1	0	4	0	0	0	0	6	1	32	0	3	0	0	0	1	1	1	23
0	8.3	1	0	0	4	1	0	0	0	6	1	36	1	3	0	0	0	0	0	0	41
0	8.4	1	0	0	4	0	1	0	0	7	1	38	0	3	0	1	0	0	0	0	44
0	8.6	0	0	1	4	0	0	1	0	8	1	3	0	3	1	0	0	0	1	1	47
0	8.9	0	0	1	4	1	0	2	0	9	0	2	0	2	0	0	0	0	0	0	46
0	9	0	0	1	3	0	0	0	0	10	0	8	0	6	0	0	0	1	0	0	48
0	9.7	0	0	1	3	0	1	0	0	11	0	7	0	5	0	0	0	0	0	0	49
0	9.5	0	0	1	3	1	0	1	0	12	0	9	0	4	0	0	1	0	1	0	52
0	9.4	0	0	1	3	0	0	0	0	13	0	27	1	10	1	0	0	0	0	0	78
0	1	0	0	1	3	0	0	2	1	14	0	26	0	9	0	0	0	0	0	0	32
0	1.5	0	0	1	3	1	1	0	0	15	0	24	0	9	0	1	0	0	0	0	77
0	1.6	0	0	1	3	0	0	0	0	15	1	28	0	8	0	0	0	0	1	1	90
0	1.2	0	0	1	3	0	0	1	0	15	1	24	0	8	0	0	0	0	1	1	84
0	1.3	0	0	2	5	1	0	2	0	10	1	25	1	8	0	0	0	1	1	1	83
0	1.5	0	0	2	5	0	1	0	0	9	1	26	0	7	0	0	0	0	1	1	87
0	1.4	0	0	2	5	0	0	0	1	13	1	23	0	6	1	1	0	0	0	0	72
0	1.6	0	0	2	5	1	0	1	0	10	1	34	0	6	0	0	0	0	0	0	71
0	1.8	0	0	2	5	0	0	0	0	10	1	38	0	7	0	0	0	0	0	0	65
0	1.9	0	0	2	5	0	1	2	0	12	1	39	0	6	0	0	0	0	1	1	63
0	1.7	0	0	2	5	1	0	0	0	13	1	35	0	6	0	1	0	0	0	0	68
0	1.5	0	0	2	5	0	0	1	0	14	1	34	0	6	0	0	1	0	0	0	64
0	1.6	0	0	2	4	0	0	2	1	15	0	33	0	5	1	0	0	1	0	0	58
0	1.2	0	0	2	3	1	1	0	0	16	0	33	1	6	0	0	0	0	1	1	52
0	1.3	0	0	3	3	0	0	0	0	17	0	32	0	6	0	0	0	0	1	1	57
0	1.4	0	0	3	3	0	0	1	0	18	0	35	0	6	0	0	0	0	1	1	54
0	1.8	0	0	3	3	1	0	2	0	10	0	3	0	6	0	0	1	0	1	1	52
0	1.6	0	0	3	3	0	1	0	0	8	0	69	0	5	0	1	0	1	0	0	51
0	1.8	0	0	3	2	0	0	0	0	7	0	68	0	5	1	0	0	0	0	0	53
0	2.4	0	0	3	2	1	0	1	1	5	0	67	1	5	0	0	0	0	1	1	52
0	2.6	0	0	3	2	0	0	0	0	11	1	64	0	5	0	0	0	0	0	0	59
0	2.7	0	0	3	2	0	1	2	0	10	1	61	0	9	0	0	0	0	0	0	46
0	2.8	0	0	3	2	1	0	0	0	9	1	60	0	10	0	1	0	0	0	0	43
0	2.4	0	0	3	1	0	0	0	0	8	1	68	1	10	1	0	1	1	0	0	48
0	2.8	0	0	4	1	0	0	0	1	8	1	65	0	9	0	0	0	0	1	1	49
0	3.4	0	0	4	1	1	0	0	0	7	1	62	0	9	0	0	0	0	1	1	47
0	3.3	0	0	4	1	0	1	1	0	6	1	69	1	8	1	0	0	0	1	1	41
0	3.1	0	0	4	1	0	0	2	0	11	1	67	0	8	0	0	1	1	1	1	42
0	3.2	0	0	4	6	1	0	1	0	12	1	62	0	8	0	0	0	0	1	1	46
0	3.5	0	0	4	5	0	0	2	0	13	1	70	0	4	0	0	0	0	0	0	45
0	3.4	0	0	4	2	0	0	0	0	15	0	71	1	5	0	0	0	0	1	1	48
0	3.8	0	0	4	1	1	1	0	0	10	0	72	0	5	0	1	0	0	1	1	47
0	3.4	0	0	4	4	0	0	0	1	9	0	79	0	5	1	0	0	1	1	1	49
0	2.5	0	0	4	3	0	0	0	0	9	0	78	1	5	0	0	1	0	1	1	32
0	2.6	1	0	0	2	1	0	1	0	12	0	74	0	5	0	0	0	0	1	1	36
0	2.7	1	1	0	3	0	0	1	0	13	0	75	0	5	0	0	0	0	1	1	39
0	2.8	1	1	0	2	0	0	2	0	15	0	71	0	6	1	0	0	1	0	0	35
0	2.9	1	1	0	2	1	1	0	0	11	0	78	1	3	0	0	0	0	0	0	34
0	3.4	1	0	0	2	0	0	0	0	17	0	72	0	4	0	1	1	0	0	0	36
0	3.5	1	0	0	2	0	0	1	0	9	0	78	0	3	0	0	0	0	0	0	38
0	3.6	1	0	0	1	1	0	2	0	5	1	80	0	3	0	0	0	1	1	1	37
0	3.7	1	0	0	1	0	0	2	0	6	1	84	0	4	0	0	0	0	1	1	35
0	4.9	1	1	0	1	1	1	0	1	7	1	86	0	4	1	0	0	0	1	1	25
0	4.5	1	0	0	1	0	0	0	0	8	1	87	1	4	0	1	1	0	1	1	27
0	4.8	1	1	1	1	0	0	1	0	9	1	85	0	4	0	0	0	0	1	1	29
0	4.7	1	1	1	1	1	0	0	0	10	1	80	0	4	0	1	0	0	0	0	25
0	4.6	1	1	1	6	0	0	1	1	11	1	89	0	3	0	0	0	0	1	1	26
0	4.5	0	1	1	7	0	0	0	0	12	1	90	0	3	0	0	0	1	1	1	18
0	5.1	1	0	1	2	1	1	2	0	13	1	80	1	3	0	0	1	0	0	0	13
0	5.2	1	0	1	1	0	0	0	1	15	1	0	0	3	0	1	0	0	0	0	82
0	5.3	1	1	1	5	1	0	0	0	8	0	70	0	2	0	0	0	0	0	0	87
0	5.4	1	0	1	3	0	0	1	0	11	0	55	0	3	0	0	0	0	0	0	86
0	5.5	1	1	1	2	0	0	2	1	12	0	68	1	3	1	1	0	0	0	0	85
0	5.9	1	1	1	1	1	0	0	0	10	0	90	0	3	0	0	0	1	1	1	84
0	5.7	1	0	2	4	0	1	0	0	9	0	45	0	2	0	0	1	0	0	0	71
0	5.8	1	0	2	2	0	0	0	0	9	0	20	0	2	0	0	0	0	0	0	73
0	2.3	1	0	2	2	1	0	1	1	15	0	15	0	2	1	1	0	0	1	1	76
0	3.7	0	1	2	3	0	0	2	0	8	0	20	1	2	0	0	0	1	0	0	79
0	10	1	0	2	4	0	1	2	0	8	0	0	0	2	0	0	0	0	1	1	77
0	6.5	0	0	2	3	1	1	0	0	8	0	35	0	2	0	1	0	0	0	0	75
0	5.6	1	0	2	1	0	0	0	0	15	0	40	0	9	0	0	1	1	0	0	74
0	5.1	1	0	2	6	0	0	1	0	10	1	0	0	1	1	0	0	0	1	1	72
0	8.1	1	1	2	2	1	0	1	1	9	1	80	1	1	0	0	0	0	0	0	59
0	7.3	1	1	2	5	0	0	0	0	8	1	81	0	2	0	1	0	0	0	0	58
0	6.4	1	1	3	5	0	1	2	0	7	1	70	0	0	0	0	0	1	1	1	55
0	5.6	1	1	3	4	1	0	2	1	6	1	70	0	1	0	0	0	0	0	0	59
0	9.1	0	0	3	4	0	0	0	0	6	1	80	0	1	0	0	1	0	1	1	54
0	10.2	0	0	3	4	0	0	1	0	7	1	88	0	0	1	0	0	1	0	0	57
0	2.1	0	0	3	1	1	1	0	1	8	1	88	0	1	0	0	0	0	1	0	56
0	6.4	0	0	3	1	1	0	2	0	9	0	85	0	0	0	1	0	0	0	0	52
0	9.8	0	0	3	1	1	1	0	0	10	0	89	1	1	0	0	0	0	0	0	54
0	9.7	0	0	3	7	1	0	0	1	11	0	79	0	2	0	0	1	1	1	1	62
0	9.6	0	0	3	5	1	1	0	0	12	0	50	0	2	0	0	0	0	1	1	64
0	9.5	0	0	3	7	0	0	0	0	13	0	40	0	2	0	0	0	0	1	1	69
0	9.4	1	0	4	3	0	0	1	0	14	0	45	0	2	0	1	0	0	1	1	68
0	9.3	1	1	4	2	0	1	0	0	15	0	48	1	3	1	0	0	1	1	1	67
0	8.4	1	0	4	4	0	1	0	0	15	1	49	0	3	0	0	0	0	1	1	62
0	10.2	1	0	4	1	0	0	1	1	15	1	48	0	2	0	0	0	0	1	1	65
0	6.6	1	0	4	2	0	0	0	0	10	1	52	0	1	0	1	0	0	1	1	63
0	5.7	1	0	4	3	1	1	2	0	9	1	59	1	2	1	0	0	0	1	1	64
0	7.3	1	1	4	2	0	0	0	0	13	1	58	0	2	0	0	0	1	1	1	68
0	2.1	1	1	4	2	0	0	1	0	10	1	56	0	1	0	0	0	0	1	1	69
0	2.2	1	0	4	2	1	1	0	0	10	1	57	0	2	0	0	0	0	1	1	62
0	2.3	1	0	4	1	0	0	0	0	12	1	51	0	2	1	1	1	0	1	1	64
0	2.5	0	0	0	1	0	0	2	0	13	1	52	0	1	0	0	0	0	1	1	66
0	2.6	0	0	0	2	1	1	0	0	14	1	80	0	2	0	0	0	1	1	1	62
0	2.8	0	0	0	3	0	0	0	0	15	0	84	0	0	0	0	0	0	0	0	65
0	2.9	0	0	0	5	0	0	1	0	16	0	80	1	0	0	0	0	0	0	0	68
0	3	0	0	0	4	1	1	2	0	17	0	89	0	0	0	1	0	0	1	1	52
0	3.5	0	0	0	3	0	0	0	0	18	0	85	0	0	0	0	0	0	1	1	51
0	3.6	0	0	0	3	0	0	0	0	10	0	87	0	1	1	0	1	0	1	1	58
0	3.8	0	0	0	2	1	0	0	0	8	0	86	0	1	0	0	0	0	1	1	57
0	3.7	0	0	0	2	0	1	1	0	7	0	70	1	1	0	0	0	0	1	1	54
0	4.1	0	0	0	1	0	0	2	0	5	0	74	0	1	0	0	0	1	1	1	52
0	4.3	0	0	1	1	1	0	0	0	11	1	79	0	1	1	0	0	0	0	0	53
0	4.6	0	0	1	5	0	0	0	0	10	1	11	0	0	0	0	1	0	1	1	51
0	4.7	0	0	1	1	0	1	1	0	9	1	90	1	1	0	1	0	0	1	1	59
0	5.1	0	0	1	2	1	0	0	0	8	1	90	0	1	0	0	0	1	1	1	54
0	5.9	0	0	1	3	0	0	2	1	8	1	10	0	1	0	0	0	0	1	1	58
0	5.8	0	0	1	3	0	0	0	0	7	1	16	0	4	1	0	0	0	0	0	52
0	5.7	0	0	1	1	1	1	0	0	6	1	15	0	2	0	0	0	0	0	0	54
0	5.4	0	0	1	1	0	0	1	0	11	1	17	0	0	0	1	1	0	0	0	55
0	6.7	0	0	1	2	0	0	2	0	12	1	18	0	1	0	0	0	0	0	0	48
0	6.8	0	0	1	2	1	0	0	0	13	1	19	1	1	0	0	0	1	1	1	49
0	6.9	0	0	2	4	0	1	0	1	15	0	20	0	5	0	0	0	0	0	0	47
0	7.2	0	0	2	4	0	0	1	0	9	0	24	0	9	0	1	0	0	0	0	46
0	7.3	0	0	2	4	1	0	0	0	9	0	25	0	8	1	0	0	0	1	1	41
0	7.5	0	0	2	4	0	0	2	0	9	0	26	0	7	0	0	0	0	0	0	42
0	7.4	0	0	2	4	0	1	0	0	12	0	28	1	4	0	0	0	1	0	0	43
0	2.1	0	0	2	3	1	0	1	0	13	0	27	0	6	0	0	0	0	0	0	48
0	2.5	0	0	2	3	0	0	2	1	15	0	26	0	2	0	0	1	0	1	0	45
0	2.6	0	0	2	3	0	0	0	0	11	0	21	0	3	1	0	0	0	0	0	46
0	2.4	0	0	2	3	1	1	0	0	17	0	25	0	3	0	0	0	0	0	0	47
0	2.8	0	0	2	3	0	0	1	0	9	0	24	0	15	0	1	0	0	0	0	49
0	2.7	0	0	3	3	0	0	2	0	5	1	23	0	14	0	0	0	0	1	1	45
0	3.1	0	0	3	3	1	0	0	0	6	1	20	0	13	0	0	0	0	1	1	51
0	3.5	0	0	3	3	0	1	0	0	7	1	25	0	14	0	0	0	1	1	1	58
0	3.3	0	0	3	5	0	0	1	1	8	1	26	1	11	0	0	0	0	1	1	59
0	3.6	0	0	3	5	1	0	0	0	9	1	28	0	12	1	1	0	0	0	0	59
0	4.5	0	0	3	5	0	0	2	0	10	1	25	0	2	0	0	0	0	0	0	54
0	4.6	0	0	3	5	0	1	0	0	11	1	11	0	0	0	0	0	0	0	0	52
0	4.3	0	0	3	5	1	0	0	0	12	1	15	0	2	0	0	0	0	1	1	50
0	5.4	0	0	3	5	0	0	0	1	13	1	10	0	8	0	1	0	0	0	0	56
0	5.6	0	0	3	5	0	0	0	0	15	1	19	1	9	0	0	1	0	0	0	58
0	5.5	1	0	4	5	1	0	1	0	8	0	51	0	7	1	0	0	1	0	0	52
0	6.1	1	1	4	4	0	1	2	0	11	0	59	0	1	0	0	0	0	1	1	53
0	6.3	1	1	4	3	0	0	1	0	12	0	58	0	5	0	0	0	0	1	1	51
0	6.5	1	1	4	3	1	0	2	0	11	0	54	1	5	0	0	0	0	1	1	58
0	6.7	1	0	4	3	0	0	0	0	13	0	56	0	4	0	0	1	0	1	1	59
0	7.4	1	0	4	3	0	0	0	0	15	0	52	0	4	0	1	0	1	0	0	62
0	7.5	1	0	4	3	1	1	0	1	15	0	53	1	6	1	0	0	0	0	0	68
0	7.6	1	0	4	2	0	0	0	0	18	0	11	0	6	0	0	0	0	1	1	67
0	7.6	1	1	4	2	0	0	1	0	17	0	8	0	3	0	0	0	0	0	0	64
0	7.9	1	0	4	2	1	0	1	0	16	0	5	0	3	0	0	0	0	0	0	62
0	8.2	1	1	0	2	0	0	2	0	15	0	4	1	5	0	1	0	0	0	0	61
0	8.3	1	1	0	2	0	0	0	0	10	1	6	0	2	1	0	1	1	0	0	69
0	8.4	1	1	0	1	1	1	0	0	9	1	1	0	5	0	0	0	0	1	1	68
0	8.6	0	1	0	1	0	0	1	0	8	1	2	1	7	0	0	0	0	1	1	72
0	8.9	1	0	0	1	0	0	2	0	7	1	5	0	3	1	0	0	0	1	1	71
0	9	1	0	0	1	1	0	2	0	6	1	5	0	2	0	0	1	1	1	1	71
0	9.7	1	1	0	1	0	0	0	1	6	1	44	0	2	0	0	0	0	1	1	36
0	9.5	1	0	0	6	1	1	0	0	7	1	16	1	2	0	0	0	0	0	0	35
0	9.4	1	1	0	5	0	0	1	0	8	1	18	0	3	0	0	0	0	1	1	39
0	1	1	1	0	2	0	0	0	0	9	0	12	0	3	0	1	0	0	1	1	34
0	1.5	1	0	1	1	1	0	1	1	10	0	90	0	3	1	0	0	1	1	1	48
0	1.6	1	0	1	4	0	0	0	0	11	0	90	0	3	0	0	1	0	1	1	49
0	1.2	1	0	1	3	0	0	2	0	12	0	1	0	3	0	0	0	0	1	1	47
0	1.3	0	1	1	2	1	1	0	1	13	0	2	1	1	0	0	0	0	1	1	45
0	1.5	1	0	1	3	0	0	0	0	14	0	5	0	1	1	0	0	1	0	0	41
0	1.4	0	0	1	2	1	0	1	0	15	0	9	0	5	0	0	0	0	0	0	42
0	1.6	1	0	1	2	0	0	2	1	15	1	8	0	6	0	1	1	0	0	0	43
0	1.8	1	0	1	2	0	0	0	0	15	1	7	0	4	0	0	0	0	0	0	48
0	1.9	1	1	1	2	1	0	0	0	10	1	6	1	4	0	0	0	1	1	1	55
0	1.7	1	1	1	1	0	1	0	0	9	1	5	0	5	0	0	0	0	1	1	54
0	1.5	1	1	2	1	0	0	1	1	13	1	8	0	6	1	0	0	0	1	1	56
0	1.6	1	1	2	1	1	0	2	0	10	1	7	0	5	0	1	1	0	1	1	58
0	1.2	0	0	2	1	0	0	2	0	10	1	4	1	4	0	0	0	0	1	1	59
0	1.3	0	0	2	1	0	1	0	0	12	1	6	0	4	0	1	0	0	0	0	53
0	1.4	0	0	2	1	1	1	0	0	13	1	1	0	3	0	0	0	0	1	1	23
0	1.8	0	0	2	6	0	0	1	0	14	1	11	0	3	0	0	0	1	1	1	41
0	1.6	0	0	2	7	0	0	1	1	15	0	15	0	3	0	0	1	0	0	0	44
0	1.8	0	0	2	2	1	0	0	0	8	0	19	1	3	0	1	0	0	0	0	47
0	2.4	0	0	2	1	0	0	2	0	9	0	14	0	2	0	0	0	0	0	0	46
0	2.6	0	0	2	5	0	1	2	1	9	0	18	0	6	0	0	0	0	0	0	48
0	2.7	1	0	3	3	1	0	0	0	10	0	16	0	5	1	1	0	0	0	0	49
0	2.8	1	1	3	2	0	0	1	0	8	0	17	0	4	0	0	0	1	1	1	52
0	2.4	1	0	3	1	0	0	0	1	7	0	12	1	10	0	0	1	0	0	0	78
0	2.8	1	0	3	4	1	1	2	0	5	0	42	0	9	0	0	0	0	0	0	54
0	3.4	1	0	3	2	1	0	0	0	11	1	48	0	9	1	1	0	0	1	1	77
0	3.3	1	0	3	2	1	1	0	1	10	1	46	0	8	0	0	0	1	0	0	90
0	3.1	1	1	3	3	1	0	0	0	9	1	48	0	8	0	0	0	0	1	1	84
0	3.2	1	1	3	4	1	1	0	0	8	1	47	0	8	0	1	0	0	0	0	83
0	3.5	1	0	3	3	0	0	1	0	8	1	49	0	7	0	0	1	1	0	0	87
0	3.4	1	0	3	1	0	0	0	0	7	1	42	0	6	1	0	0	0	1	1	72
0	3.8	0	0	4	6	0	1	0	0	6	1	41	1	6	0	0	0	0	0	0	71
0	3.4	0	0	4	2	0	1	1	1	11	1	34	0	7	0	1	0	0	0	0	65
0	2.5	0	0	4	5	0	0	0	0	12	1	32	0	6	0	0	0	1	1	1	63
0	2.6	0	0	4	5	0	0	2	0	13	1	35	0	6	0	0	0	0	0	0	68
0	2.7	0	0	4	4	1	1	0	0	15	0	39	0	6	0	0	1	0	1	1	64
0	2.8	0	0	4	4	0	0	1	0	10	0	32	1	5	1	0	0	1	0	0	58
0	2.9	0	0	4	4	0	0	0	0	9	0	36	0	6	0	0	0	0	1	0	52
0	3.4	0	0	4	1	1	1	0	0	8	0	38	0	6	0	1	0	0	0	0	57
0	3.5	0	0	4	1	0	0	2	0	8	0	3	0	6	0	0	0	0	0	0	54
0	3.6	0	0	4	1	0	0	0	0	13	0	2	1	6	0	0	1	1	1	1	52
0	3.7	0	0	0	7	1	1	0	0	15	0	8	0	5	0	0	0	0	1	1	51
0	4.9	0	0	0	5	0	0	1	0	11	0	7	0	5	0	0	0	0	1	1	53
0	4.5	0	0	0	7	0	0	2	0	8	0	9	0	5	0	1	0	0	1	1	52
0	4.8	0	0	0	3	1	1	0	0	9	0	27	0	5	1	0	0	1	1	1	59
0	4.7	0	0	0	2	0	0	0	0	5	1	26	0	9	0	0	0	0	1	1	46
0	4.6	0	0	0	4	0	0	0	0	6	1	24	0	10	0	0	0	0	1	1	43
0	4.5	0	0	0	1	1	0	1	0	7	1	28	0	10	0	1	0	0	1	1	48
0	5.1	0	0	0	2	0	1	2	0	8	1	24	1	9	1	0	0	0	1	1	49
0	5.2	0	0	0	3	0	0	0	0	9	1	25	0	9	0	0	0	1	1	1	47
0	5.3	0	0	0	2	1	0	0	0	10	1	26	0	8	0	0	0	0	1	1	41
0	5.4	0	0	1	2	0	0	1	0	11	1	23	0	8	0	0	0	0	1	1	42
0	5.5	0	0	1	2	0	1	0	0	12	1	34	0	8	1	1	1	0	1	1	46
0	5.9	0	0	1	1	1	0	2	1	13	1	38	1	4	0	0	0	0	1	1	45
0	5.7	0	0	1	1	0	0	0	0	9	1	39	0	5	0	0	0	1	1	1	48
0	5.8	0	0	1	2	0	0	0	0	8	0	35	0	5	0	0	0	0	0	0	47
0	2.3	0	0	1	3	1	1	1	0	11	0	34	0	5	0	0	0	0	0	0	49
0	3.7	0	0	1	5	0	0	2	0	12	0	33	1	5	0	1	0	0	1	1	32
0	10	0	0	1	4	0	0	0	0	12	0	33	0	5	0	0	0	0	1	1	36
0	6.5	0	0	1	3	1	0	0	1	9	0	32	0	5	1	0	1	0	1	1	39
0	5.6	0	0	1	3	0	1	1	0	14	0	35	0	6	0	0	0	0	1	1	35
0	5.1	0	0	2	2	0	0	0	0	15	0	3	0	9	0	0	0	0	1	1	34
0	8.1	0	0	2	2	1	0	2	0	9	0	69	0	4	0	0	0	1	1	1	36
0	7.3	0	0	2	1	0	0	0	0	9	0	68	0	3	1	0	0	0	0	0	38
0	6.4	0	0	2	1	0	1	1	0	9	0	67	1	3	0	0	1	0	1	1	37
0	5.6	0	0	2	5	1	0	2	1	9	0	64	0	4	0	1	0	0	1	1	35
0	9.1	0	0	2	1	0	0	0	0	10	1	61	0	4	0	0	0	1	1	1	25
0	10.2	0	0	2	2	0	0	0	0	9	1	60	0	4	0	0	0	0	1	1	27
0	2.1	0	0	2	3	1	1	1	0	8	1	68	0	4	1	0	0	0	0	0	29
0	6.4	0	0	2	3	0	0	2	0	7	1	65	1	4	0	0	0	0	0	0	25
0	9.8	0	0	2	1	0	0	0	0	6	1	62	0	3	0	1	1	0	0	0	26
0	9.7	1	0	3	1	1	0	0	0	6	1	69	0	3	0	0	0	0	0	0	18
0	9.6	1	1	3	2	0	1	1	1	7	1	67	0	3	0	0	0	1	1	1	13
0	9.5	1	1	3	2	0	0	0	0	8	1	62	0	3	0	0	0	0	0	0	82
0	9.4	1	1	3	4	1	0	2	0	9	0	70	0	2	0	1	0	0	0	0	87
0	9.3	1	0	3	4	0	0	0	0	10	0	71	0	3	1	0	0	0	1	1	86
0	8.4	1	0	3	4	0	1	0	0	11	0	72	0	3	0	0	0	0	0	0	85
0	10.2	1	0	3	4	1	0	0	1	12	0	79	0	3	0	0	0	1	0	0	84
0	6.6	1	0	3	4	0	0	0	0	13	0	78	1	2	0	0	0	0	0	0	71
0	5.7	1	1	3	3	0	0	1	0	14	0	74	0	2	0	0	1	0	1	0	73
0	7.3	1	0	3	3	1	0	2	0	15	0	75	0	2	1	0	0	0	0	0	76
0	2.1	1	1	4	3	0	1	1	0	15	1	71	0	2	0	0	0	0	0	0	79
0	2.2	1	1	4	3	0	0	2	0	15	1	78	0	2	0	1	0	0	0	0	77
0	2.3	1	1	4	3	1	0	0	0	10	1	72	0	2	0	0	0	0	1	1	75
0	2.5	0	1	4	3	0	0	0	0	9	1	78	1	4	0	0	0	0	1	1	74
0	2.6	1	0	4	3	0	0	0	1	13	1	80	0	1	0	0	0	1	1	1	72
0	2.8	1	0	4	3	1	1	0	0	10	1	84	0	1	0	0	0	0	1	1	59
0	2.9	1	1	4	5	0	0	1	0	10	1	86	0	2	1	1	0	0	0	0	58
0	3	1	0	4	5	0	0	1	0	12	1	87	1	0	0	0	0	0	0	0	55
0	3.5	1	1	4	5	1	0	2	0	13	1	85	0	1	0	0	0	0	0	0	59
0	3.6	1	1	4	5	0	0	0	0	14	1	80	0	1	0	0	0	0	1	1	54
0	3.8	1	0	0	5	0	0	0	0	15	0	89	1	0	0	1	0	0	0	0	57
0	3.7	1	0	0	5	1	1	1	0	8	0	90	0	1	0	0	1	0	0	0	56
0	4.1	1	0	0	5	0	0	2	0	8	0	20	0	0	1	0	0	1	0	0	52
0	4.3	0	1	0	5	0	0	2	0	8	0	35	0	1	0	0	0	0	1	1	54
0	4.6	1	0	0	4	1	0	0	1	10	0	0	1	2	0	0	0	0	1	1	62
0	4.7	0	0	0	3	0	0	0	0	8	0	55	0	2	0	0	0	0	1	1	64
0	5.1	1	0	0	3	1	1	1	0	7	0	0	0	2	0	0	1	0	1	1	69
0	5.9	1	0	0	3	0	0	0	0	5	0	75	1	2	0	1	0	1	0	0	68
0	5.8	1	1	0	3	0	0	1	1	11	1	0	0	3	1	0	0	0	0	0	67
0	5.7	1	1	0	3	1	0	0	0	10	1	90	0	3	0	0	0	0	1	1	62
0	5.4	1	1	1	2	0	0	2	0	9	1	0	0	2	0	0	0	0	0	0	65
0	6.7	1	1	1	2	0	0	0	1	8	1	85	1	1	0	0	0	0	0	0	63
0	6.8	0	0	1	2	1	1	0	0	8	1	20	0	2	0	1	0	0	0	0	64
0	6.9	0	0	1	2	0	0	1	0	7	1	35	0	2	1	0	1	1	0	0	68
0	7.2	0	0	1	2	1	0	2	1	6	1	5	0	1	0	0	0	0	1	1	69
0	7.3	0	0	1	1	0	0	0	0	11	1	0	0	2	0	0	0	0	1	1	62
0	7.5	0	0	1	1	0	0	0	0	12	1	80	0	2	1	0	0	0	1	1	64
0	7.4	0	0	1	1	1	0	0	0	13	1	81	1	1	0	0	1	1	1	1	66
0	2.1	0	0	1	1	0	1	1	1	15	0	70	0	2	0	0	0	0	1	1	62
0	2.5	0	0	1	1	0	0	2	0	10	0	70	0	0	0	0	0	0	0	0	65
0	2.6	1	0	2	6	1	0	2	0	9	0	80	0	0	0	0	0	0	1	1	68
0	2.4	1	1	2	5	0	0	0	0	9	0	88	0	0	0	1	0	0	1	1	52
0	2.8	1	0	2	2	0	1	0	0	9	0	88	1	0	1	0	0	1	1	1	51
0	2.7	1	0	2	1	1	1	1	0	8	0	85	0	1	0	0	1	0	1	1	58
0	3.1	1	0	2	4	0	0	1	1	8	0	89	0	1	0	0	0	0	1	1	57
0	3.5	1	0	2	3	0	0	0	0	8	0	79	0	1	0	0	0	0	1	1	54
0	3.3	1	1	2	2	1	0	2	0	9	0	50	1	1	1	0	0	1	0	0	52
0	3.6	1	1	2	3	0	0	2	1	9	0	40	0	1	0	0	0	0	0	0	53
0	4.5	1	0	2	2	0	1	0	0	5	1	45	0	0	0	1	1	0	0	0	51
0	4.6	1	0	2	2	1	0	1	0	6	1	48	0	1	0	0	0	0	0	0	59
0	4.3	0	0	3	2	0	0	0	1	7	1	49	0	1	0	0	0	1	1	1	54
0	5.4	0	0	3	2	0	0	2	0	8	1	48	1	1	0	0	0	0	1	1	58
0	5.6	0	0	3	1	1	1	0	0	9	1	52	0	4	1	0	0	0	1	1	52
0	5.5	0	0	3	1	1	0	0	1	10	1	59	0	2	0	1	1	0	1	1	54
0	6.1	0	0	3	1	1	1	0	0	11	1	58	0	0	0	0	0	0	1	1	55
0	6.3	0	0	3	1	1	0	0	0	12	1	56	0	1	0	1	0	0	0	0	48
0	6.5	0	0	3	1	1	1	1	0	13	1	57	1	1	0	0	0	0	1	1	49
0	6.7	0	0	3	1	0	0	0	0	15	1	51	0	5	0	0	0	1	1	1	47
0	7.4	0	0	3	6	0	0	0	0	8	0	52	0	9	0	0	1	0	0	0	46
0	7.5	0	0	3	7	0	1	1	1	11	0	80	0	8	0	1	0	0	0	0	41
0	7.6	0	0	4	2	0	1	0	0	12	0	84	0	7	0	0	0	0	0	0	42
0	7.6	0	0	4	1	0	0	2	0	8	0	80	0	4	0	0	0	0	0	0	43
0	7.9	0	0	4	5	0	0	0	0	10	0	89	0	6	1	1	0	0	0	0	48
0	8.2	0	0	4	3	1	1	1	0	9	0	85	0	2	0	0	0	1	1	1	45
0	8.3	0	0	4	2	0	0	0	0	10	0	87	1	3	0	0	1	0	0	0	46
0	8.4	0	0	4	1	0	0	0	0	8	0	86	0	3	0	0	0	0	0	0	47
0	8.6	0	0	4	4	1	1	2	0	9	0	70	0	15	1	1	0	0	1	1	49
0	8.9	0	0	4	2	0	0	0	0	9	0	74	0	14	0	0	0	1	0	0	45
0	9	0	0	4	2	0	0	0	0	10	0	79	0	13	0	0	0	0	1	1	51
0	9.7	0	0	4	3	1	1	1	0	10	1	11	1	14	0	1	0	0	0	0	58
0	9.5	0	0	0	4	0	0	2	0	9	1	90	0	11	0	0	1	1	0	0	59
0	9.4	0	0	0	3	0	0	0	0	8	1	90	0	12	1	0	0	0	1	1	59
0	1	0	0	0	1	1	1	0	0	7	1	10	0	2	0	0	0	0	0	0	54
0	1.5	0	0	0	6	0	0	0	0	6	1	16	1	0	0	1	0	0	0	0	52
0	1.6	0	0	0	2	0	0	1	0	6	1	15	0	2	0	0	0	1	1	1	50
0	1.2	0	0	0	5	1	0	2	0	7	1	17	0	8	0	0	0	0	0	0	56
0	1.3	0	0	0	5	0	1	0	0	8	1	18	0	9	0	0	1	0	1	1	58
0	1.5	0	0	0	4	0	0	0	0	9	0	19	0	7	1	0	0	1	0	0	52
0	1.4	0	0	0	4	1	0	1	0	10	0	20	0	1	0	0	0	0	1	0	53
0	1.6	0	0	0	4	0	0	0	0	11	0	24	0	5	0	1	0	0	0	0	51
0	1.8	0	0	1	1	0	1	2	1	12	0	25	0	5	0	0	0	0	0	0	58
0	1.9	0	0	1	1	1	0	0	0	13	0	26	1	4	0	0	1	1	1	1	59
0	1.7	0	0	1	1	0	0	0	0	14	0	28	0	4	0	0	0	0	1	1	62
0	1.5	0	0	1	7	0	0	1	0	15	0	27	0	6	0	0	0	0	1	1	68
0	1.6	0	0	1	5	1	1	2	0	15	1	26	0	6	0	1	0	0	1	1	67
0	1.2	0	0	1	7	0	0	0	0	15	1	21	0	3	1	0	0	1	1	1	64
0	1.3	0	0	1	3	0	0	0	1	10	1	25	1	3	0	0	0	0	1	1	62
0	1.4	0	0	1	2	1	0	1	0	9	1	24	0	5	0	0	0	0	1	1	61
0	1.8	0	0	1	4	0	1	0	0	13	1	23	0	2	0	1	0	0	1	1	69
0	1.6	0	0	1	1	0	0	2	0	10	1	20	0	5	1	0	0	0	1	1	68
0	1.8	1	0	2	2	1	0	0	0	10	1	25	1	7	0	0	0	1	1	1	72
0	2.4	1	1	2	3	0	0	1	0	12	1	26	0	3	0	0	0	0	1	1	71
0	2.6	1	1	2	2	0	1	2	1	13	1	28	0	2	0	0	0	0	1	1	71
0	2.7	1	1	2	2	1	0	0	0	14	1	25	0	2	1	1	1	0	1	1	36
0	2.8	1	0	2	2	0	0	0	0	15	0	11	0	2	0	0	0	0	1	1	35
0	2.4	1	0	2	1	0	0	1	0	9	0	15	0	3	0	0	0	1	1	1	39
0	2.8	1	0	2	1	1	1	2	0	9	0	10	0	3	0	0	0	0	0	0	34
0	3.4	1	0	2	2	0	0	0	0	9	0	19	1	3	0	0	0	0	0	0	48
0	3.3	1	1	2	3	0	0	0	0	10	0	51	0	3	0	1	0	0	1	1	49
0	3.1	1	0	2	5	1	0	1	1	8	0	59	0	3	0	0	0	0	1	1	47
0	3.2	1	1	3	4	0	1	0	0	7	0	58	0	1	1	0	1	0	1	1	45
0	3.5	1	1	3	3	0	0	2	0	5	0	54	0	1	0	0	0	0	1	1	41
0	3.4	1	1	3	3	1	0	0	0	11	1	56	1	5	0	0	0	0	1	1	42
0	3.8	0	1	3	2	0	0	0	0	10	1	52	0	6	0	0	0	1	1	1	43
0	3.4	1	0	3	2	0	1	0	1	9	1	53	0	4	1	0	0	0	0	0	48
0	2.5	1	0	3	1	1	0	0	0	8	1	11	0	4	0	0	1	0	1	1	55
0	2.6	1	1	3	1	0	0	1	0	8	1	8	0	5	0	1	0	0	1	1	54
0	2.7	1	0	3	5	0	0	2	0	7	1	5	0	6	0	0	0	1	1	1	56
0	2.8	1	1	3	1	1	0	1	0	6	1	4	0	5	0	0	0	0	1	1	58
0	2.9	1	1	3	2	0	1	2	0	11	1	6	0	4	1	0	0	0	0	0	59
0	3.4	1	0	4	3	0	0	0	0	12	1	1	0	4	0	0	0	0	0	0	53
0	3.5	1	0	4	3	1	0	0	0	13	1	2	1	3	0	1	1	0	0	0	23
0	3.6	1	0	4	1	0	0	0	1	15	0	5	0	3	0	0	0	0	0	0	41
0	3.7	0	1	4	1	0	0	0	0	20	0	5	0	3	0	0	0	1	1	1	44
0	4.9	1	0	4	2	1	1	1	0	9	0	44	0	3	0	0	0	0	0	0	47
0	4.5	0	0	4	2	0	0	1	0	8	0	16	0	2	0	1	0	0	0	0	46
0	4.8	1	0	4	4	0	0	2	0	8	0	18	0	6	1	0	0	0	1	1	48
0	4.7	1	0	4	4	1	0	0	0	9	0	12	1	5	0	0	0	0	0	0	49
0	4.6	1	1	4	4	0	0	0	0	10	0	90	0	4	0	0	0	1	0	0	52
0	4.5	1	1	4	4	0	0	1	0	11	0	90	0	10	0	0	0	0	0	0	78
0	5.1	1	1	0	4	1	1	2	0	10	0	1	0	9	0	0	1	0	1	0	62
0	5.2	1	1	0	3	0	0	2	0	9	0	2	1	9	1	0	0	0	0	0	77
0	5.3	0	0	0	3	0	0	0	1	5	1	5	0	8	0	0	0	0	0	0	90
0	5.4	0	0	0	3	1	0	0	0	6	1	9	0	8	0	1	0	0	0	0	84
0	5.5	0	0	0	3	0	0	1	0	7	1	8	1	8	0	0	0	0	1	1	83
0	5.9	0	0	0	3	1	1	0	0	8	1	7	0	7	0	0	0	0	1	1	87
0	5.7	0	0	0	3	0	0	1	1	9	1	6	0	6	0	0	0	1	1	1	72
0	5.8	0	0	0	3	0	0	0	0	10	1	5	0	6	0	0	0	0	1	1	71
0	2.3	0	0	0	3	1	0	2	0	11	1	8	1	7	1	1	0	0	0	0	65
0	3.7	0	0	0	5	0	0	0	1	12	1	7	0	6	0	0	0	0	0	0	63
0	10	1	0	1	5	0	0	0	0	13	1	4	0	6	0	0	0	0	0	0	68
0	6.5	1	1	1	5	1	1	1	0	15	1	6	1	6	0	0	0	0	1	1	64
0	5.6	1	0	1	5	0	0	2	1	8	0	1	0	5	0	1	0	0	0	0	58
0	5.1	1	0	1	5	1	0	0	0	11	0	11	0	6	0	0	1	0	0	0	52
0	8.1	1	0	1	5	0	0	0	0	12	0	15	0	6	1	0	0	1	0	0	57
0	7.3	1	0	1	5	0	0	0	0	11	0	19	1	6	0	0	0	0	1	1	54
0	6.4	1	1	1	5	1	0	1	1	9	0	14	0	6	0	0	0	0	1	1	52
0	5.6	1	1	1	4	0	1	2	0	12	0	18	0	5	0	0	0	0	1	1	51
0	9.1	1	0	1	3	0	0	2	0	10	0	16	0	5	0	0	1	0	1	1	53
0	10.2	1	0	1	3	1	0	0	0	9	0	17	0	5	0	1	0	1	0	0	52
0	2.1	0	0	2	3	0	0	0	0	9	0	12	0	5	1	0	0	0	0	0	59
0	6.4	0	0	2	3	0	1	1	0	9	0	42	1	9	0	0	0	0	1	1	46
0	9.8	0	0	2	3	1	1	1	1	8	0	48	0	10	0	0	0	0	0	0	43
0	9.7	0	0	2	2	0	0	0	0	10	1	46	0	10	0	0	0	0	0	0	48
0	9.6	0	0	2	2	0	0	2	0	9	1	48	0	9	0	1	0	0	0	0	49
0	9.5	0	0	2	2	1	0	2	1	8	1	47	0	9	1	0	1	1	0	0	47
0	9.4	0	0	2	2	0	0	0	0	7	1	49	1	8	0	0	0	0	1	1	41
0	9.3	0	0	2	2	0	1	1	0	6	1	42	0	8	0	0	0	0	1	1	42
0	8.4	0	0	2	1	1	0	0	1	6	1	41	0	8	1	0	0	0	1	1	46
0	10.2	0	0	2	1	0	0	2	0	7	1	34	0	4	0	0	1	1	1	1	45
0	6.6	0	0	3	1	0	0	0	0	8	1	32	1	5	0	0	0	0	1	1	48
0	5.7	0	0	3	1	1	1	0	1	9	0	35	0	5	0	0	0	0	0	0	47
0	7.3	0	0	3	1	1	0	0	0	10	0	39	0	5	0	0	0	0	1	1	49
0	2.1	0	0	3	6	1	1	0	0	11	0	32	0	5	0	1	0	0	1	1	32
0	2.2	0	0	3	5	1	0	1	0	12	0	36	0	5	1	0	0	1	1	1	36
0	2.3	0	0	3	2	1	1	0	0	13	0	38	1	5	0	0	1	0	1	1	39
0	2.5	0	0	3	1	0	0	0	0	14	0	3	0	6	0	0	0	0	1	1	35
0	2.6	0	0	3	4	0	0	1	1	15	0	2	0	6	0	0	0	0	1	1	34
0	2.8	0	0	3	3	0	1	0	0	15	1	8	0	4	1	0	0	1	0	0	36
0	2.9	0	0	3	2	0	1	2	0	15	1	7	0	3	0	0	0	0	0	0	38
0	3	0	0	4	3	0	0	0	0	10	1	9	1	3	0	1	1	0	0	0	37
0	3.5	0	0	4	2	0	0	1	0	9	1	27	0	4	0	0	0	0	0	0	35
0	3.6	0	0	4	2	1	1	0	0	13	1	26	0	4	0	0	0	1	1	1	25
0	3.8	0	0	4	2	0	0	0	0	10	1	24	0	4	0	0	0	0	1	1	27
0	3.7	0	0	4	2	0	0	2	0	10	1	28	0	4	1	0	0	0	1	1	29
0	4.1	0	0	4	1	1	1	0	0	12	1	24	0	4	0	1	1	0	1	1	25
0	4.3	0	0	4	1	0	0	0	0	13	1	25	0	3	0	0	0	0	1	1	26
0	4.6	0	0	4	1	0	0	1	0	14	1	26	0	3	0	1	0	0	0	0	18
0	4.7	0	0	4	1	1	1	2	0	9	0	23	1	3	0	0	0	0	1	1	13
0	5.1	0	0	4	1	0	0	0	0	9	0	34	0	3	0	0	0	1	1	1	82
0	5.9	0	0	0	1	0	0	0	0	8	0	38	0	2	0	0	1	0	0	0	87
0	5.8	0	0	0	6	1	1	0	0	8	0	39	0	3	0	1	0	0	0	0	86
0	5.7	0	0	0	7	0	0	1	0	8	0	35	0	3	0	0	0	0	0	0	85
0	5.4	0	0	0	2	0	0	2	0	8	0	34	1	3	0	0	0	0	0	0	84
0	6.7	0	0	0	1	1	0	0	0	7	0	33	0	2	1	1	0	0	0	0	71
0	6.8	0	0	0	5	0	1	0	0	5	0	33	0	2	0	0	0	1	1	1	73
0	6.9	0	0	0	3	0	0	1	0	11	1	32	0	2	0	0	1	0	0	0	76
0	7.2	0	0	0	2	1	0	0	0	10	1	35	1	2	0	0	0	0	0	0	79
0	7.3	0	0	0	1	0	0	2	1	9	1	3	0	2	1	1	0	0	1	1	77
0	7.5	0	0	0	4	0	1	0	0	8	1	69	0	2	0	0	0	1	0	0	75
0	7.4	1	0	1	2	1	0	0	0	8	1	68	0	3	0	0	0	0	1	1	74
0	2.1	1	1	1	2	0	0	1	0	7	1	67	0	1	0	1	0	0	0	0	72
0	2.5	1	1	1	3	0	0	2	0	6	1	64	0	1	0	0	1	1	0	0	59
0	2.6	1	1	1	4	1	1	0	0	11	1	61	0	2	1	0	0	0	1	1	58
0	2.4	1	0	1	3	0	0	0	1	12	1	60	0	0	0	0	0	0	0	0	55
0	2.8	1	0	1	1	0	0	1	0	13	1	68	1	1	0	1	0	0	0	0	59
0	2.7	1	0	1	6	1	0	0	0	15	0	65	0	1	0	0	0	1	1	1	54
0	3.1	1	0	1	2	0	1	2	0	10	0	62	0	0	0	0	0	0	0	0	57
0	3.5	1	1	1	5	0	0	0	0	9	0	69	0	1	0	0	1	0	1	1	56
0	3.3	1	0	1	5	1	0	1	0	8	0	67	0	0	1	0	0	1	0	0	52
0	3.6	1	1	2	4	0	0	2	1	7	0	62	1	1	0	0	0	0	1	0	54
0	4.5	1	1	2	4	0	1	0	0	9	0	70	0	2	0	1	0	0	0	0	62
0	4.6	1	1	2	4	1	0	0	0	10	0	71	0	2	0	0	0	0	0	0	64
0	4.3	0	1	2	1	0	0	1	0	11	0	72	0	2	0	0	1	1	1	1	69
0	5.4	1	0	2	1	0	0	2	0	10	0	79	1	2	0	0	0	0	1	1	68
0	5.6	1	0	2	1	1	1	0	0	9	0	78	0	3	0	0	0	0	1	1	67
0	5.5	1	1	2	7	0	0	0	0	5	1	74	0	3	0	1	0	0	1	1	62
0	6.1	1	0	2	5	0	0	1	1	6	1	75	0	2	1	0	0	1	1	1	65
0	6.3	1	1	2	7	1	0	0	0	7	1	71	0	1	0	0	0	0	1	1	63
0	6.5	1	1	2	3	0	1	2	0	8	1	78	0	2	0	0	0	0	1	1	64
0	6.7	1	0	3	2	0	0	0	0	9	1	72	0	2	0	1	0	0	1	1	68
0	7.4	1	0	3	4	1	0	0	0	10	1	78	1	1	1	0	0	0	1	1	69
0	7.5	1	0	3	1	0	0	0	1	11	1	80	0	2	0	0	0	1	1	1	62
0	7.6	0	1	3	2	0	1	0	0	12	1	84	0	2	0	0	0	0	1	1	64
0	7.6	1	0	3	3	1	0	1	0	13	1	86	0	1	0	0	0	0	1	1	66
0	7.9	0	0	3	2	0	0	2	0	15	1	87	0	2	1	1	1	0	1	1	62
0	8.2	1	0	3	2	0	0	1	0	8	0	85	1	0	0	0	0	0	1	1	65
0	8.3	1	0	3	2	1	0	2	0	11	0	80	0	0	0	0	0	1	1	1	68
0	8.4	1	1	3	1	0	1	0	0	12	0	89	0	0	0	0	0	0	0	0	52
0	8.6	1	1	3	1	0	0	0	0	11	0	90	0	0	0	0	0	0	0	0	51
0	8.9	1	1	4	2	1	0	0	1	12	0	10	0	1	0	1	0	0	1	1	58
0	9	1	1	4	3	0	0	0	0	9	0	5	0	1	0	0	0	0	1	1	57
0	9.7	0	0	4	5	0	0	1	0	15	0	0	0	1	1	0	1	0	1	1	54
0	9.5	0	0	4	4	1	1	1	0	18	0	80	0	1	0	0	0	0	1	1	52
0	9.4	0	0	4	3	0	0	2	0	17	0	0	0	1	0	0	0	0	1	1	53
0	1	0	0	4	3	0	0	0	0	16	0	90	1	0	0	0	0	1	1	1	51
0	1.5	0	0	4	2	1	0	0	0	15	0	0	0	1	1	0	0	0	0	0	59
0	1.6	0	0	4	2	0	0	1	0	10	1	25	0	1	0	0	1	0	1	1	54
0	1.2	0	0	4	1	0	0	2	0	9	1	0	0	1	0	1	0	0	1	1	58
0	1.3	0	0	4	1	1	1	2	0	8	1	40	0	4	0	0	0	1	1	1	52
0	1.5	1	0	0	5	0	0	0	1	7	1	0	0	2	0	0	0	0	1	1	54
0	1.4	1	1	0	1	0	0	0	0	6	1	55	1	0	1	0	0	0	0	0	55
0	1.6	1	0	0	2	1	0	1	0	6	1	0	0	1	0	0	0	0	0	0	48
0	1.8	1	0	0	3	0	0	0	0	7	1	40	0	1	0	1	1	0	0	0	49
0	1.9	1	0	0	3	1	1	1	1	8	1	80	0	5	0	0	0	0	0	0	47
0	1.7	1	0	0	1	0	0	0	0	9	0	81	1	9	0	0	0	1	1	1	46
0	1.5	1	1	0	1	0	0	2	0	10	0	70	0	8	0	0	0	0	0	0	41
0	1.6	1	1	0	2	1	0	0	1	11	0	70	0	7	0	1	0	0	0	0	42
0	1.2	1	0	0	2	0	0	0	0	12	0	80	1	4	1	0	0	0	1	1	43
0	1.3	1	0	0	4	0	0	1	0	13	0	88	0	6	0	0	0	0	0	0	48
0	1.4	0	0	1	4	1	1	2	1	14	0	88	0	2	0	0	0	1	0	0	45
0	1.8	0	0	1	4	0	0	0	0	15	0	85	0	3	0	0	0	0	0	0	46
0	1.6	0	0	1	4	1	0	0	0	15	1	89	1	3	0	0	1	0	1	0	47
0	1.8	0	0	1	4	0	0	0	0	15	1	79	0	15	1	0	0	0	0	0	49
0	2.4	0	0	1	3	0	0	1	1	10	1	50	0	14	0	0	0	0	0	0	45
0	2.6	0	0	1	3	1	0	2	0	9	1	40	1	13	0	1	0	0	0	0	51
0	2.7	0	0	1	3	0	1	2	0	13	1	45	0	14	0	0	0	0	1	1	58
0	2.8	0	0	1	3	0	0	0	0	10	1	48	0	11	0	0	0	0	1	1	59
0	2.4	0	0	1	3	1	0	0	0	10	1	49	0	12	0	0	0	1	1	1	59
0	2.8	0	0	1	3	0	0	1	0	12	1	48	1	2	0	0	0	0	1	1	54
0	3.4	0	0	2	3	0	1	1	1	13	1	52	0	0	1	1	0	0	0	0	52
0	3.3	0	0	2	3	1	1	0	0	10	1	59	0	2	0	0	0	0	0	0	50
0	3.1	0	0	2	5	0	0	2	0	9	0	58	0	8	0	0	0	0	0	0	56
0	3.2	0	0	2	5	0	0	2	1	8	0	56	0	9	0	0	0	0	1	1	58
0	3.5	0	0	2	5	1	0	0	0	8	0	57	0	7	0	1	0	0	0	0	52
0	3.4	0	0	2	5	0	0	1	0	9	0	51	1	1	0	0	1	0	0	0	53
0	3.8	0	0	2	5	0	1	0	1	9	0	52	0	5	1	0	0	1	0	0	51
0	3.4	0	0	2	5	1	0	2	0	8	0	80	0	5	0	0	0	0	1	1	58
0	2.5	0	0	2	5	0	0	0	0	7	0	84	0	4	0	0	0	0	1	1	59
0	2.6	0	0	2	5	0	0	0	1	5	0	80	0	4	0	0	0	0	1	1	62
0	2.7	0	0	3	4	1	1	0	0	11	1	89	1	6	0	0	1	0	1	1	68
0	2.8	0	0	3	3	1	0	0	0	10	1	85	0	6	0	1	0	1	0	0	67
0	2.9	0	0	3	3	1	1	1	0	9	1	87	0	3	1	0	0	0	0	0	64
0	3.4	0	0	3	3	1	0	0	0	8	1	86	0	3	0	0	0	0	1	1	62
0	3.5	0	0	3	3	1	1	0	0	8	1	70	1	5	0	0	0	0	0	0	61
0	3.6	0	0	3	3	0	0	1	1	7	1	74	0	2	0	0	0	0	0	0	69
0	3.7	0	0	3	2	0	0	0	0	6	1	79	0	5	0	1	0	0	0	0	68
0	4.9	0	0	3	2	0	1	2	0	11	1	11	0	7	1	0	1	1	0	0	72
0	4.5	0	0	3	2	0	1	0	0	12	1	90	0	3	0	0	0	0	1	1	71
0	4.8	0	0	3	2	0	0	1	0	13	1	90	1	2	0	0	0	0	1	1	71
0	4.7	0	0	4	2	0	0	0	0	15	0	10	0	2	1	0	0	0	1	1	36
0	4.6	0	0	4	1	1	1	0	0	15	0	16	0	2	0	0	1	1	1	1	35
0	4.5	0	0	4	1	0	0	2	0	10	0	15	0	3	0	0	0	0	1	1	39
0	5.1	0	0	4	1	0	0	0	0	9	0	17	0	3	0	0	0	0	0	0	34
0	5.2	0	0	4	1	1	1	0	0	8	0	18	1	3	0	0	0	0	1	1	48
0	5.3	0	0	4	1	0	0	1	0	9	0	19	0	3	0	1	0	0	1	1	49
0	5.4	0	0	4	6	0	0	2	0	9	0	20	0	3	1	0	0	1	1	1	47
0	5.5	0	0	4	5	1	1	0	0	11	0	24	0	1	0	0	1	0	1	1	45
0	5.9	0	0	4	2	0	0	0	0	10	0	25	0	1	0	0	0	0	1	1	41
0	5.7	0	0	4	1	0	0	0	0	9	0	26	0	5	0	0	0	0	1	1	42
0	5.8	1	0	0	4	1	1	1	0	5	1	28	0	6	1	0	0	1	0	0	43
0	2.3	1	1	0	3	0	0	2	0	6	1	27	0	4	0	0	0	0	0	0	48
0	3.7	1	1	0	2	0	0	0	0	7	1	26	1	4	0	1	1	0	0	0	55
0	10	1	1	0	3	1	0	0	0	8	1	21	0	5	0	0	0	0	0	0	54
0	6.5	1	0	0	2	0	1	1	0	9	1	25	0	6	0	0	0	1	1	1	56
0	5.6	1	0	0	2	0	0	0	0	10	1	24	0	5	0	0	0	0	1	1	58
0	5.1	1	0	0	2	1	0	2	1	11	1	23	0	4	1	0	0	0	1	1	59
0	8.1	1	0	0	2	0	0	0	0	12	1	20	1	4	0	1	1	0	1	1	53
0	7.3	1	1	0	1	0	1	0	0	13	1	25	0	3	0	0	0	0	1	1	23
0	6.4	1	0	0	1	1	0	1	0	15	1	26	0	3	0	1	0	0	0	0	41
0	5.6	1	1	1	1	0	0	2	0	8	0	28	0	3	0	0	0	0	1	1	44
0	9.1	1	1	1	1	0	0	0	0	11	0	25	1	3	0	0	0	1	1	1	47
0	10.2	1	1	1	1	1	1	0	1	12	0	11	0	2	0	0	1	0	0	0	46
0	2.1	0	1	1	1	0	0	1	0	10	0	15	0	6	0	1	0	0	0	0	48
0	6.4	1	0	1	6	0	0	0	0	10	0	10	0	5	0	0	0	0	0	0	49
0	9.8	1	0	1	7	1	0	2	0	10	0	19	0	4	0	0	0	0	0	0	52
0	9.7	1	1	1	2	0	1	0	0	15	0	51	0	10	1	1	0	0	0	0	78
0	9.6	1	0	1	1	0	0	1	0	10	0	59	0	9	0	0	0	1	1	1	55
0	9.5	1	1	1	5	1	0	2	1	10	0	58	0	9	0	0	1	0	0	0	77
0	9.4	1	1	1	3	0	0	0	0	9	0	54	1	8	0	0	0	0	0	0	90
0	9.3	1	0	2	2	0	1	0	0	9	0	56	0	8	1	1	0	0	1	1	84
0	8.4	1	0	2	1	1	0	1	0	10	1	52	0	8	0	0	0	1	0	0	83
0	10.2	1	0	2	4	0	0	2	0	9	1	53	0	7	0	0	0	0	1	1	87
0	6.6	0	1	2	2	0	0	0	0	8	1	11	0	6	0	1	0	0	0	0	72
0	5.7	1	0	2	2	1	1	0	0	7	1	8	1	6	0	0	1	1	0	0	71
0	7.3	0	0	2	3	0	0	1	1	6	1	5	0	7	1	0	0	0	1	1	65
0	2.1	1	0	2	4	0	0	0	0	6	1	4	0	6	0	0	0	0	0	0	63
0	2.2	1	0	2	3	1	0	2	0	7	1	6	0	6	0	1	0	0	0	0	68
0	2.3	1	1	2	1	0	1	0	0	8	1	1	1	6	0	0	0	1	1	1	64
0	2.5	1	1	2	6	0	0	0	0	9	0	2	0	5	0	0	0	0	0	0	58
0	2.6	1	1	3	2	1	0	0	1	10	0	5	0	6	0	0	1	0	1	1	52
0	2.8	1	1	3	5	0	0	0	0	11	0	5	0	6	1	0	0	1	0	0	57
0	2.9	0	0	3	5	0	1	1	0	12	0	44	0	6	0	0	0	0	1	0	54
0	3	0	0	3	4	1	0	2	0	13	0	16	0	6	0	1	0	0	0	0	52
0	3.5	0	0	3	4	0	0	1	0	14	0	18	0	5	0	0	0	0	0	0	51
0	3.6	0	0	3	4	0	0	2	0	15	0	12	1	5	0	0	1	1	1	1	53
0	3.8	0	0	3	1	1	0	0	0	15	1	90	0	5	0	0	0	0	1	1	52
0	3.7	0	0	3	1	0	1	0	0	15	1	90	0	5	0	0	0	0	1	1	59
0	4.1	0	0	3	1	0	0	0	1	10	1	1	0	9	0	1	0	0	1	1	46
0	4.3	0	0	3	7	1	0	0	0	9	1	2	0	10	1	0	0	1	1	1	43
0	4.6	1	0	4	5	0	0	1	0	13	1	5	1	10	0	0	0	0	1	1	48
0	4.7	1	1	4	7	0	0	1	0	10	1	9	0	9	0	0	0	0	1	1	49
0	5.1	1	0	4	3	1	1	2	0	10	1	8	0	9	0	1	0	0	1	1	47
0	5.9	1	0	4	2	0	0	0	0	12	1	7	0	8	1	0	0	0	1	1	41
0	5.8	1	0	4	4	0	0	0	0	13	1	6	0	8	0	0	0	1	1	1	42
0	5.7	1	0	4	1	1	0	1	0	14	1	5	0	8	0	0	0	0	1	1	46
0	5.4	1	1	4	2	0	0	2	0	15	0	8	0	4	0	0	0	0	1	1	45
0	6.7	1	1	4	3	0	0	2	0	9	0	7	0	5	1	1	1	0	1	1	48
0	6.8	1	0	4	2	1	1	0	1	9	0	4	0	5	0	0	0	0	1	1	47
0	6.9	1	0	4	2	0	0	0	0	9	0	6	1	5	0	0	0	1	1	1	49
0	7.2	0	0	0	2	0	0	1	0	10	0	1	0	5	0	0	0	0	0	0	32
0	7.3	0	0	0	1	1	0	0	0	8	0	11	0	5	0	0	0	0	0	0	36
0	7.5	0	0	0	1	0	0	1	1	7	0	15	0	5	0	1	0	0	1	1	39
0	7.4	0	0	0	2	1	1	0	0	5	0	19	0	6	0	0	0	0	1	1	35
0	2.1	0	0	0	3	0	0	2	0	11	1	14	0	4	1	0	1	0	1	1	34
0	2.5	0	0	0	5	0	0	0	1	10	1	18	1	4	0	0	0	0	1	1	36
0	2.6	0	0	0	4	1	0	0	0	9	1	16	0	3	0	0	0	0	1	1	38
0	2.4	0	0	0	3	0	0	1	0	8	1	17	0	3	0	0	0	1	1	1	37
0	2.8	0	0	0	3	0	0	2	1	8	1	12	0	4	1	0	0	0	0	0	35
0	2.7	0	0	0	2	1	1	0	0	7	1	42	1	4	0	0	1	0	1	1	25
0	3.1	0	0	1	2	0	0	0	0	6	1	48	0	4	0	1	0	0	1	1	27
0	3.5	0	0	1	1	1	0	0	0	11	1	46	0	4	0	0	0	1	1	1	29
0	3.3	0	0	1	1	0	0	1	1	12	1	48	1	4	0	0	0	0	1	1	25
0	3.6	0	0	1	5	0	0	2	0	13	1	47	0	3	1	0	0	0	0	0	26
0	4.5	0	0	1	1	1	0	2	0	15	0	49	0	3	0	0	0	0	0	0	18
0	4.6	0	0	1	2	0	1	0	0	9	0	42	0	3	0	1	1	0	0	0	13
0	4.3	0	0	1	3	0	0	0	0	18	0	41	1	3	0	0	0	0	0	0	82
0	5.4	0	0	1	3	1	0	1	0	16	0	34	0	2	0	0	0	1	1	1	87
0	5.6	0	0	1	1	0	0	1	1	12	0	32	0	3	0	0	0	0	0	0	86
0	5.5	0	0	1	1	0	1	0	0	13	0	35	1	3	0	1	0	0	0	0	85
0	6.1	0	0	2	2	1	1	2	0	15	0	39	0	3	1	0	0	0	1	1	84
0	6.3	0	0	2	2	0	0	2	1	11	0	32	0	2	0	0	0	0	0	0	71
0	6.5	0	0	2	4	0	0	0	0	17	0	36	0	2	0	0	0	1	0	0	73
0	6.7	0	0	2	4	1	0	1	0	9	0	38	1	2	0	0	0	0	0	0	76
0	7.4	0	0	2	4	0	0	0	1	5	1	3	0	2	0	0	1	0	1	0	79
0	7.5	0	0	2	4	0	1	2	0	6	1	2	0	2	1	0	0	0	0	0	77
0	7.6	0	0	2	4	1	0	0	0	7	1	8	0	2	0	0	0	0	0	0	75
0	7.6	0	0	2	3	0	0	0	1	8	1	7	0	2	0	1	0	0	0	0	74
0	7.9	0	0	2	3	0	0	0	0	9	1	9	0	1	0	0	0	0	1	1	72
0	8.2	0	0	2	3	1	1	0	0	10	1	27	1	1	0	0	0	0	1	1	59
0	8.3	0	0	3	3	1	0	1	0	11	1	26	0	2	0	0	0	1	1	1	58
0	8.4	0	0	3	3	1	1	0	0	12	1	24	0	0	0	0	0	0	1	1	55
0	8.6	0	0	3	3	1	0	0	0	13	1	28	0	1	1	1	0	0	0	0	59
0	8.9	0	0	3	3	1	1	1	1	15	1	24	0	1	0	0	0	0	0	0	54
0	9	0	0	3	3	0	0	0	0	8	0	25	1	0	0	0	0	0	0	0	57
0	9.7	0	0	3	5	0	0	2	0	11	0	26	0	1	0	0	0	0	1	1	56
0	9.5	0	0	3	5	0	1	0	0	12	0	23	0	0	0	1	0	0	0	0	52
0	9.4	0	0	3	5	0	1	1	0	10	0	34	0	1	0	0	1	0	0	0	54
0	1	0	0	3	5	0	0	0	0	9	0	38	1	2	1	0	0	1	0	0	62
0	1.5	0	0	3	5	0	0	0	0	9	0	39	0	2	0	0	0	0	1	1	64
0	1.6	1	0	4	5	1	1	2	0	10	0	35	0	2	0	0	0	0	1	1	69
0	1.2	1	1	4	5	0	0	0	0	10	0	34	0	2	0	0	0	0	1	1	68
0	1.3	1	1	4	5	0	0	0	0	9	0	33	0	3	0	0	1	0	1	1	67
0	1.5	1	1	4	4	1	1	1	0	9	0	33	1	3	0	1	0	1	0	0	62
0	1.4	1	0	4	3	0	0	2	0	10	0	32	0	2	1	0	0	0	0	0	65
0	1.6	1	0	4	3	0	0	0	0	10	1	35	0	1	0	0	0	0	1	1	63
0	1.8	1	0	4	3	1	1	0	0	9	1	3	0	2	0	0	0	0	0	0	64
0	1.9	1	0	4	3	0	0	0	0	8	1	69	0	2	0	0	0	0	0	0	68
0	1.7	1	1	4	3	0	0	1	0	7	1	68	1	1	0	1	0	0	0	0	69
0	1.5	1	0	4	2	1	1	2	0	6	1	67	0	2	1	0	1	1	0	0	62
0	1.6	1	1	0	2	0	0	0	0	6	1	64	0	2	0	0	0	0	1	1	64
0	1.2	1	1	0	2	0	0	0	0	7	1	61	0	1	0	0	0	0	1	1	66
0	1.3	1	1	0	2	1	0	1	0	8	1	60	0	2	1	0	0	0	1	1	62
0	1.4	0	1	0	2	0	1	0	0	9	0	68	0	0	0	0	1	1	1	1	65
0	1.8	1	0	0	1	0	0	2	1	10	0	65	0	0	0	0	0	0	1	1	68
0	1.6	1	0	0	1	1	0	0	0	11	0	62	0	0	0	0	0	0	0	0	52
0	1.8	1	1	0	1	0	0	0	0	12	0	69	1	0	0	0	0	0	1	1	51
0	2.4	1	0	0	1	0	1	1	0	13	0	67	0	1	0	1	0	0	1	1	58
0	2.6	1	1	0	1	1	0	2	0	14	0	62	0	1	1	0	0	1	1	1	57
0	2.7	1	1	0	6	0	0	0	0	15	0	70	0	1	0	0	1	0	1	1	54
0	2.8	1	0	1	5	0	0	0	1	15	1	71	0	1	0	0	0	0	1	1	52
0	2.4	1	0	1	2	1	1	1	0	15	1	72	1	1	0	0	0	0	1	1	53
0	2.8	1	0	1	1	0	0	0	0	10	1	79	0	0	1	0	0	1	0	0	51
0	3.4	0	1	1	4	0	0	2	0	9	1	78	0	1	0	0	0	0	0	0	59
0	3.3	1	0	1	3	1	0	0	0	13	1	74	0	1	0	1	1	0	0	0	54
0	3.1	0	0	1	2	0	1	1	0	10	1	75	1	1	0	0	0	0	0	0	58
0	3.2	1	0	1	3	0	0	2	1	9	1	71	0	4	0	0	0	1	1	1	52
0	3.5	1	0	1	2	1	0	0	0	12	1	78	0	2	0	0	0	0	1	1	54
0	3.4	1	1	1	2	0	0	0	0	13	1	72	0	0	1	0	0	0	1	1	55
0	3.8	1	1	1	2	0	1	1	0	9	1	78	0	1	0	1	1	0	1	1	48
0	3.4	1	1	2	2	1	0	2	0	8	0	80	0	1	0	0	0	0	1	1	49
0	2.5	1	1	2	1	0	0	0	0	10	0	84	0	5	0	1	0	0	0	0	47
0	2.6	0	0	2	1	0	0	0	0	9	0	86	0	9	0	0	0	0	1	1	46
0	2.7	0	0	2	1	1	1	1	1	10	0	87	1	8	0	0	0	1	1	1	41
0	2.8	0	0	2	1	0	0	0	0	10	0	85	0	7	0	0	1	0	0	0	42
0	2.9	0	0	2	1	0	0	2	0	8	0	80	0	4	0	1	0	0	0	0	43
0	3.4	0	0	2	1	1	0	0	0	7	0	89	0	6	0	0	0	0	0	0	48
0	3.5	0	0	2	6	0	1	0	0	5	0	90	0	2	0	0	0	0	0	0	45
0	3.6	0	0	2	7	0	0	0	1	11	1	15	1	3	1	1	0	0	0	0	46
0	3.7	0	0	2	2	1	0	0	0	10	1	0	0	3	0	0	0	1	1	1	47
0	4.9	1	0	3	1	0	0	1	0	9	1	20	0	15	0	0	1	0	0	0	49
0	4.5	1	1	3	5	0	1	2	0	8	1	0	0	14	0	0	0	0	0	0	45
0	4.8	1	0	3	3	1	0	1	0	8	1	35	1	13	1	1	0	0	1	1	51
0	4.7	1	0	3	2	0	0	2	0	7	1	0	0	14	0	0	0	1	0	0	58
0	4.6	1	0	3	1	0	0	0	0	6	1	28	0	11	0	0	0	0	1	1	59
0	4.5	1	0	3	4	1	0	0	0	11	1	56	0	12	0	1	0	0	0	0	59
0	5.1	1	1	3	2	0	1	0	1	12	1	75	0	2	0	0	1	1	0	0	54
0	5.2	1	1	3	2	0	0	0	0	13	1	86	0	0	1	0	0	0	1	1	52
0	5.3	1	0	3	3	1	0	1	0	15	0	40	0	2	0	0	0	0	0	0	50
0	5.4	1	0	3	4	0	0	1	0	15	0	30	1	8	0	1	0	0	0	0	56
0	5.5	0	0	4	3	0	0	2	0	10	0	15	0	9	0	0	0	1	1	1	58
0	5.9	0	0	4	1	1	1	0	0	9	0	0	0	7	0	0	0	0	0	0	52
0	5.7	0	0	4	6	0	0	0	0	8	0	80	0	1	0	0	1	0	1	1	53
0	5.8	0	0	4	2	0	0	1	0	9	0	81	0	5	1	0	0	1	0	0	51
0	2.3	0	0	4	5	1	0	2	0	10	0	70	1	5	0	0	0	0	1	0	58
0	3.7	0	0	4	5	0	0	2	0	11	0	70	0	4	0	1	0	0	0	0	59
0	10	0	0	4	4	0	0	0	1	10	0	80	0	4	0	0	0	0	0	0	62
0	6.5	0	0	4	4	1	1	0	0	9	0	88	0	6	0	0	1	1	1	1	68
0	5.6	0	0	4	4	0	0	1	0	5	1	88	0	6	0	0	0	0	1	1	67
0	5.1	0	0	4	1	0	0	0	0	6	1	85	0	3	0	0	0	0	1	1	64
0	8.1	0	0	0	1	1	0	1	1	7	1	89	0	3	0	1	0	0	1	1	62
0	7.3	0	0	0	1	0	0	0	0	8	1	79	0	5	1	0	0	1	1	1	61
0	6.4	0	0	0	7	1	1	2	0	9	1	50	0	2	0	0	0	0	1	1	69
0	5.6	0	0	0	5	0	0	0	1	10	1	40	1	5	0	0	0	0	1	1	68
0	9.1	0	0	0	7	0	0	0	0	11	1	45	0	7	0	1	0	0	1	1	72
0	10.2	0	0	0	3	1	0	1	0	12	1	48	0	3	1	0	0	0	1	1	71
0	2.1	0	0	0	2	0	0	2	1	13	1	49	0	2	0	0	0	1	1	1	71
0	6.4	0	0	0	4	0	0	0	0	15	1	48	0	2	0	0	0	0	1	1	36
0	9.8	0	0	0	1	1	1	0	0	8	0	52	0	2	0	0	0	0	1	1	35
0	9.7	0	0	0	2	0	0	0	0	11	0	59	1	3	1	1	1	0	1	1	39
0	9.6	0	0	1	3	1	0	1	1	12	0	58	0	3	0	0	0	0	1	1	34
0	9.5	0	0	1	2	0	0	2	0	8	0	56	0	3	0	0	0	1	1	1	48
0	9.4	0	0	1	2	0	0	2	0	8	0	57	0	3	0	0	0	0	0	0	49
0	9.3	0	0	1	2	1	0	0	0	9	0	51	1	3	0	0	0	0	0	0	47
0	8.4	0	0	1	1	0	1	0	0	10	0	52	0	1	0	1	0	0	1	1	45
0	10.2	0	0	1	1	0	0	1	0	9	0	80	0	1	0	0	0	0	1	1	41
0	6.6	0	0	1	2	1	0	1	1	8	0	84	1	5	1	0	1	0	1	1	42
0	5.7	0	0	1	3	0	0	0	0	8	0	80	0	6	0	0	0	0	1	1	43
0	7.3	0	0	1	5	0	1	2	0	9	0	89	0	4	0	0	0	0	1	1	48
0	2.1	0	0	1	4	1	1	2	1	10	1	85	0	4	0	0	0	1	1	1	55
0	2.2	0	0	2	3	0	0	0	0	9	1	87	1	5	1	0	0	0	0	0	54
0	2.3	0	0	2	3	0	0	1	0	8	1	86	0	6	0	0	1	0	1	1	56
0	2.5	0	0	2	2	1	0	0	1	7	1	70	0	5	0	1	0	0	1	1	58
0	2.6	0	0	2	2	0	0	2	0	6	1	74	1	4	0	0	0	1	1	1	59
0	2.8	0	0	2	1	0	1	0	0	6	1	79	0	4	0	0	0	0	1	1	53
0	2.9	0	0	2	1	1	0	0	1	7	1	11	0	3	1	0	0	0	0	0	23
0	3	0	0	2	5	0	0	0	0	8	1	90	0	3	0	0	0	0	0	0	41
0	3.5	0	0	2	1	0	0	0	0	9	0	90	1	3	0	1	1	0	0	0	44
0	3.6	0	0	2	2	1	1	1	0	10	0	10	0	3	0	0	0	0	0	0	47
0	3.8	0	0	2	3	1	0	0	0	11	0	16	0	2	0	0	0	1	1	1	46
0	3.7	1	0	3	3	1	1	0	0	10	0	15	0	6	0	0	0	0	0	0	48
0	4.1	1	1	3	1	1	0	1	1	9	0	17	0	5	0	1	0	0	0	0	49
0	4.3	1	1	3	1	1	1	0	0	9	0	18	0	4	1	0	0	0	1	1	52
0	4.6	1	1	3	2	0	0	2	0	10	0	19	1	10	0	0	0	0	0	0	78
0	4.7	1	0	3	2	0	0	0	0	8	1	20	0	9	0	0	0	1	0	0	64
0	5.1	1	0	3	4	1	0	1	0	8	1	24	0	9	0	0	0	0	0	0	77
0	5.9	1	0	3	4	0	0	0	0	10	1	25	0	8	0	0	1	0	1	0	90
0	5.8	1	0	3	4	0	1	0	0	9	1	26	0	8	1	0	0	0	0	0	84
0	5.7	1	1	3	4	1	0	2	0	13	1	28	1	8	0	0	0	0	0	0	83
0	5.4	1	0	3	4	0	0	0	0	10	1	27	0	7	0	1	0	0	0	0	87
0	6.7	1	1	4	3	0	0	0	0	15	1	26	0	6	0	0	0	0	1	1	72
0	6.8	1	1	4	3	1	1	1	0	12	1	21	0	6	0	0	0	0	1	1	71
0	6.9	1	1	4	3	1	0	2	0	13	1	25	1	7	0	0	0	1	1	1	65
0	7.2	0	1	4	3	1	1	0	0	10	1	24	0	6	0	0	0	0	1	1	63
0	7.3	1	0	4	3	1	0	0	0	9	0	23	0	6	1	1	0	0	0	0	68
0	7.5	1	0	4	3	1	1	0	0	9	0	20	0	6	0	0	0	0	0	0	64
0	7.4	1	1	4	3	0	0	1	0	8	0	25	0	5	0	0	0	0	0	0	58
0	2.1	1	0	4	3	0	0	2	0	9	0	26	1	6	0	0	0	0	1	1	52
0	2.5	1	1	4	5	1	0	0	0	10	0	28	0	6	0	1	0	0	0	0	57
0	2.6	1	1	4	5	0	0	0	0	8	0	25	0	6	0	0	1	0	0	0	54
0	2.4	1	0	0	5	0	1	1	0	7	0	11	0	6	1	0	0	1	0	0	52
0	2.8	1	0	0	5	1	0	0	0	5	0	15	0	5	0	0	0	0	1	1	51
0	2.7	1	0	0	5	0	0	2	1	11	1	10	1	5	0	0	0	0	1	1	53
0	3.1	0	1	0	5	0	0	0	0	10	1	19	0	5	0	0	0	0	1	1	52
0	3.5	1	0	0	5	1	1	0	0	9	1	51	0	5	0	0	1	0	1	1	59
0	3.3	0	0	0	5	1	0	1	0	8	1	59	0	9	0	1	0	1	0	0	46
0	3.6	1	0	0	4	1	1	2	0	8	1	58	0	10	1	0	0	0	0	0	43
0	4.5	1	0	0	3	1	0	0	0	7	1	54	0	10	0	0	0	0	1	1	48
0	4.6	1	1	0	3	1	1	0	1	6	1	56	0	9	0	0	0	0	0	0	49
0	4.3	1	1	0	3	0	0	1	0	11	1	52	0	9	0	0	0	0	0	0	47
0	5.4	1	1	1	3	0	0	0	0	12	1	53	1	8	0	1	0	0	0	0	41
0	5.6	1	1	1	3	1	0	2	0	13	1	11	0	8	1	0	1	1	0	0	42
0	5.5	0	0	1	2	0	0	0	0	15	0	8	0	8	0	0	0	0	1	1	46
0	6.1	0	0	1	2	0	1	1	0	8	0	5	0	4	0	0	0	0	1	1	45
0	6.3	0	0	1	2	1	0	2	1	10	0	4	0	5	1	0	0	0	1	1	48
0	6.5	0	0	1	2	0	0	0	0	9	0	6	1	5	0	0	1	1	1	1	47
0	6.7	0	0	1	2	0	0	0	0	9	0	1	0	5	0	0	0	0	1	1	49
0	7.4	0	0	1	1	1	1	1	0	8	0	2	0	5	0	0	0	0	0	0	32
0	7.5	0	0	1	1	1	0	2	0	10	0	5	0	5	0	0	0	0	1	1	36
0	7.6	0	0	1	1	1	1	0	0	9	0	5	1	5	0	1	0	0	1	1	39
0	7.6	1	0	2	1	1	0	0	0	9	0	44	0	6	1	0	0	1	1	1	35
0	7.9	1	1	2	1	1	1	1	1	9	0	16	0	4	0	0	1	0	1	1	34
0	8.2	1	0	2	6	0	0	0	0	5	1	18	0	4	0	0	0	0	1	1	36
0	8.3	1	0	2	5	1	0	2	0	6	1	12	0	3	0	0	0	0	1	1	38
0	8.4	1	0	2	2	1	1	0	0	7	1	0	0	3	1	0	0	1	0	0	37
0	8.6	1	0	2	1	1	0	0	0	8	1	0	0	4	0	0	0	0	0	0	35
0	8.9	1	1	2	4	1	1	0	1	9	1	1	0	4	0	1	1	0	0	0	25
0	9	1	1	2	3	0	0	0	0	10	1	2	1	4	0	0	0	0	0	0	27
0	9.7	1	0	2	2	1	0	1	0	9	1	5	0	4	0	0	0	1	1	1	29
0	9.5	1	0	2	3	1	1	2	0	8	1	9	0	4	0	0	0	0	1	1	25
0	9.4	1	0	3	2	1	0	1	0	9	1	8	0	3	1	0	0	0	1	1	26
0	1	1	0	3	2	1	1	2	0	9	1	7	0	3	0	1	1	0	1	1	18
0	1.5	0	1	3	2	0	0	0	0	8	0	6	1	3	0	0	0	0	1	1	13
0	1.6	1	0	3	2	0	1	0	0	10	0	5	0	3	0	0	0	0	0	0	82
0	1.2	0	0	3	1	1	0	0	1	10	0	8	0	2	0	0	0	0	0	0	87
0	1.3	1	0	3	1	0	0	0	0	10	0	7	0	3	0	1	0	0	0	0	86
0	1.5	1	0	3	1	0	0	1	0	9	0	4	1	3	1	0	1	1	0	0	85
0	1.4	1	1	3	1	1	1	1	0	9	0	6	0	3	0	0	0	0	1	1	84
0	1.6	1	1	3	1	1	0	2	0	9	0	1	0	2	0	0	0	0	1	1	71
0	1.8	1	1	3	1	1	1	0	0	9	0	11	0	2	1	0	0	0	1	1	73
0	1.9	1	1	4	6	1	0	0	0	8	0	15	0	2	0	0	1	1	1	1	76
0	1.7	0	0	4	7	1	1	1	0	8	0	19	0	2	0	0	0	0	1	1	79
0	1.5	0	0	4	2	0	0	2	0	9	0	14	0	2	0	0	0	0	0	0	77
0	1.6	0	0	4	1	0	0	2	0	10	1	18	1	2	0	0	0	0	1	1	75
0	1.2	0	0	4	1	1	0	0	1	9	1	16	0	2	0	1	0	0	1	1	74
0	1.3	0	0	4	2	0	0	0	0	8	1	17	0	1	1	0	0	1	1	1	72
0	1.4	0	0	4	3	0	1	1	0	7	1	12	0	1	0	0	1	0	1	1	59
0	1.8	0	0	4	1	1	0	0	0	6	1	42	0	2	0	0	0	0	1	1	58
0	1.6	0	0	4	2	0	0	1	1	6	1	48	1	0	0	0	0	0	1	1	55
0	1.8	1	0	4	5	0	0	0	0	7	1	46	0	1	1	0	0	1	0	0	59
0	2.4	1	1	0	4	0	0	2	0	8	1	48	0	1	0	0	0	0	0	0	54
0	2.6	1	0	1	1	1	0	0	1	9	0	47	0	0	0	1	1	0	0	0	57
0	2.7	0	0	2	2	0	0	0	0	10	0	49	0	1	0	0	0	0	0	0	56
0	2.8	0	0	3	1	0	1	1	0	11	0	42	0	0	0	0	0	1	1	1	52
0	2.4	0	0	4	2	1	0	2	1	10	0	41	0	1	0	0	0	0	1	1	54
0	2.8	0	0	0	2	0	0	0	0	9	0	34	0	2	1	0	0	0	1	1	62
0	3.4	1	0	1	1	0	0	0	0	9	0	32	0	2	0	1	1	0	1	1	64
0	3.3	1	1	2	3	0	0	0	0	9	0	35	1	2	1	0	0	0	1	1	69
0	3.1	1	0	3	1	0	0	1	1	8	1	39	0	2	0	1	1	0	1	1	68
0	3.2	0	0	4	2	0	0	2	0	8	0	32	0	3	0	0	0	0	0	0	67
0	2.7	0	0	3	3	0	0	0	0	8	0	25	0	1	0	0	0	0	1	1	76
0	3.5	0	0	2	3	0	0	0	0	7	0	38	0	2	0	0	1	0	1	1	58
0	6.7	0	0	0	3	0	0	1	0	9	0	80	0	3	0	0	1	0	11	1	59
0	5.9	0	0	4	1	0	0	0	0	9	0	89	0	3	0	1	0	0	1	1	71
0	7.3	1	0	3	1	0	0	2	1	10	1	0	1	2	1	1	0	0	0	1	60
0	4.8	0	0	1	2	0	0	2	1	10	1	10	0	2	1	1	0	1	0	1	48
0	2.7	0	0	2	3	0	0	1	0	8	0	25	0	1	1	1	0	1	0	0	35
0	5.1	0	0	2	2	0	0	1	0	7	0	39	0	1	1	1	0	1	0	0	25
0	6.4	0	0	1	1	0	0	0	0	11	0	48	1	1	1	1	1	0	1	0	46
0	3.7	0	0	4	2	0	0	0	0	9	0	4	0	1	1	1	1	0	1	1	49
1	0	1	1	0	2	0	0	0	1	19	1	0	0	3	0	0	0	0	0	0	62
1	0	1	0	0	8	0	0	0	0	17	1	38	0	2	0	1	0	0	0	0	73
1	0.4	0	1	2	3	1	0	2	1	15	1	46	0	1	0	1	0	0	1	0	57
1	0.1	1	0	2	2	1	0	2	1	14	1	12	1	4	0	1	0	0	1	0	41
1	0.3	0	1	3	4	1	1	0	1	5	0	26	0	5	0	1	0	0	1	0	35
1	0.1	1	0	3	5	1	1	0	0	8	1	35	0	3	1	0	0	0	1	1	48
1	0	1	1	0	3	1	1	2	0	7	1	45	1	2	0	1	0	0	1	1	59
1	0.9	0	0	2	6	1	1	2	1	9	0	58	1	9	1	0	1	1	0	1	66
1	1	1	1	3	4	1	1	0	0	10	1	68	0	8	0	0	1	1	0	1	70
1	0	1	1	0	4	1	1	0	0	5	1	71	1	2	1	0	1	1	0	0	56
1	0.4	1	1	2	2	1	1	0	1	11	0	88	1	8	0	0	1	1	1	0	64
1	0	0	1	0	10	1	1	2	0	8	1	57	1	10	0	0	1	0	0	0	50
1	0	1	1	0	3	1	1	2	1	9	0	60	1	1	0	1	0	1	0	0	31
1	0.5	1	1	1	5	1	0	2	1	11	1	84	1	2	1	1	1	1	0	0	58
1	0.6	1	0	0	7	1	1	2	1	12	1	85	0	3	1	1	1	0	1	1	64
1	0	1	1	2	6	1	1	1	0	8	1	90	1	5	1	0	0	1	1	1	78
1	0	1	1	2	2	0	1	1	1	7	1	10	0	0	0	1	0	0	1	1	80
1	0	0	1	2	5	0	1	0	0	5	1	12	1	1	1	1	1	1	1	0	54
1	0.5	1	0	0	3	1	0	0	0	10	0	15	1	6	1	0	1	0	1	1	68
1	1	1	1	4	2	1	1	0	1	13	1	16	0	8	0	1	0	1	0	1	57
1	0.8	1	1	0	3	1	1	1	1	14	0	35	1	2	1	1	1	0	0	1	48
1	0.3	0	1	2	6	1	1	1	1	10	0	76	0	5	1	1	0	1	0	0	55
1	0.1	1	1	2	9	0	0	2	0	12	1	42	1	3	1	1	0	1	1	0	48
1	0	1	1	2	11	1	1	2	1	5	1	50	1	4	1	0	1	0	0	0	67
1	0.5	1	0	3	4	1	1	0	0	3	1	68	0	5	0	1	0	1	0	1	70
1	0.3	1	1	0	3	1	1	2	1	6	0	70	1	7	0	0	1	0	1	1	69
1	0.6	1	1	0	7	1	0	2	1	5	0	21	1	5	1	1	0	1	1	0	57
1	0.1	1	1	0	6	1	1	1	1	8	1	0	0	1	1	1	1	0	1	0	67
